# Supplementary material for: A general and efficient aldehyde decarbonylation reaction by using a palladium catalyst
Source: Royal Society of Chemistry journal article supplement (doi:10.1039/c2cc31144e), 2012-01-01

# **A General and Efficient Aldehyde Decarbonylation Reaction by Palladium Catalyst**

Atanu Modak, Arghya Deb, Tuhin Patra, Sujoy Rana, Soham Maity and Debabrata  
Maiti\*

Department of Chemistry, Indian Institute of Technology Bombay,  
Powai, Mumbai 400076, India

**RECEIVED DATE (automatically inserted by publisher);** E-mail:  
dmaiti@chem.iitb.ac.in

*Supporting Information*

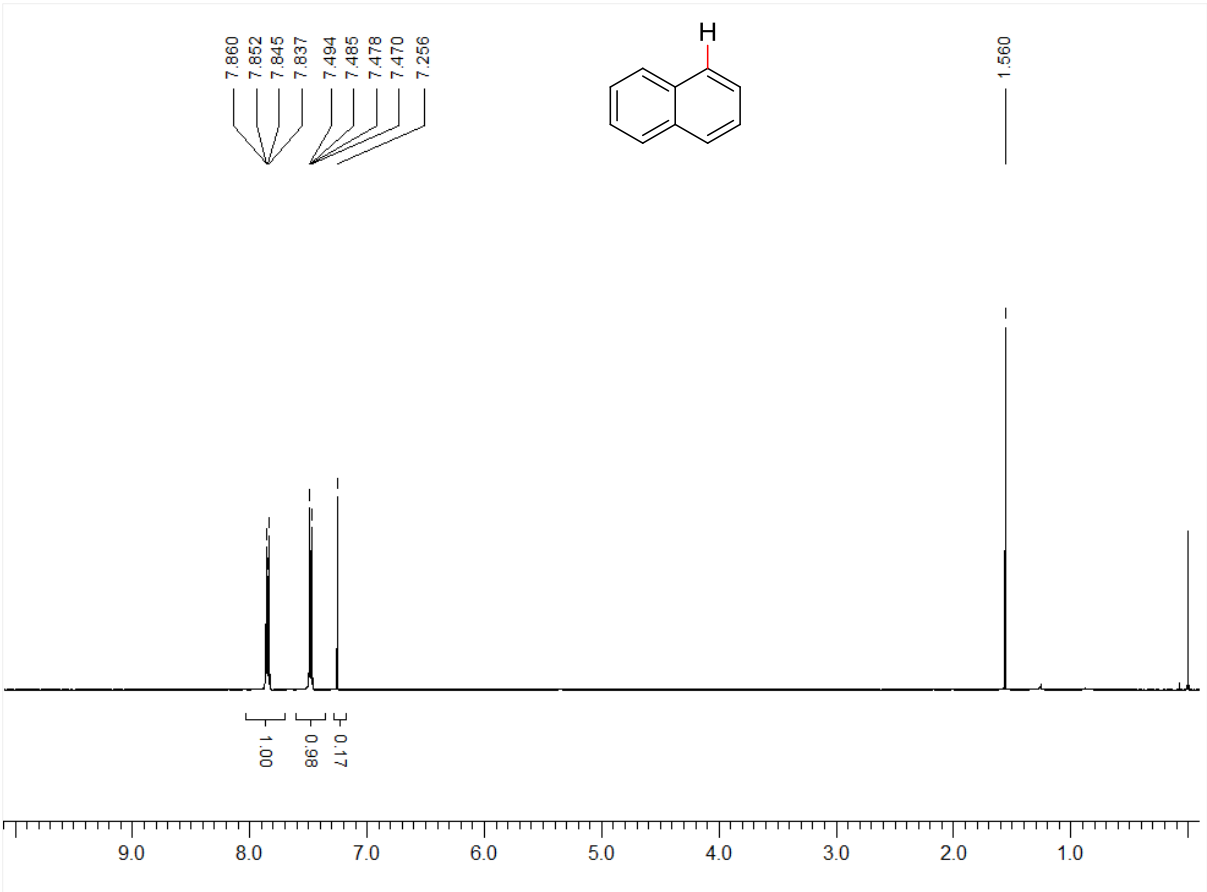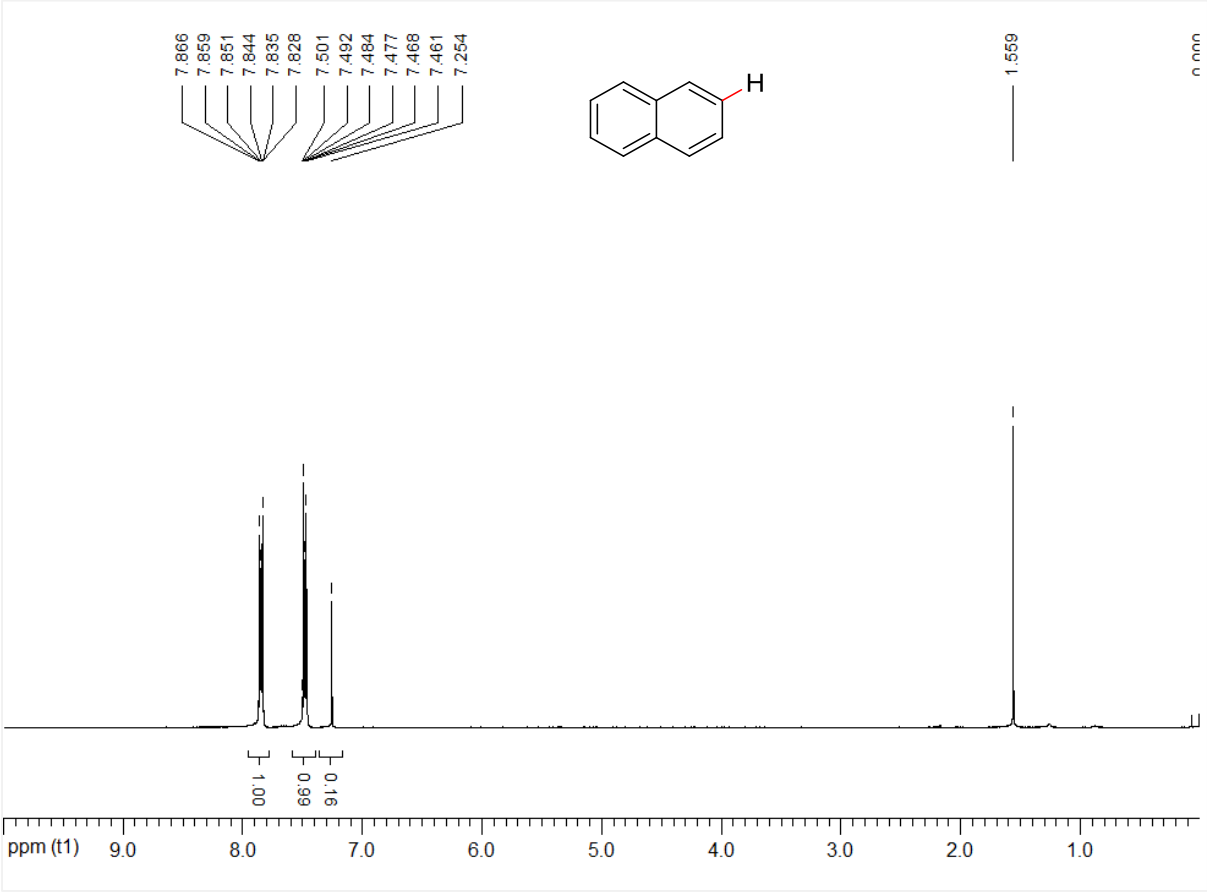

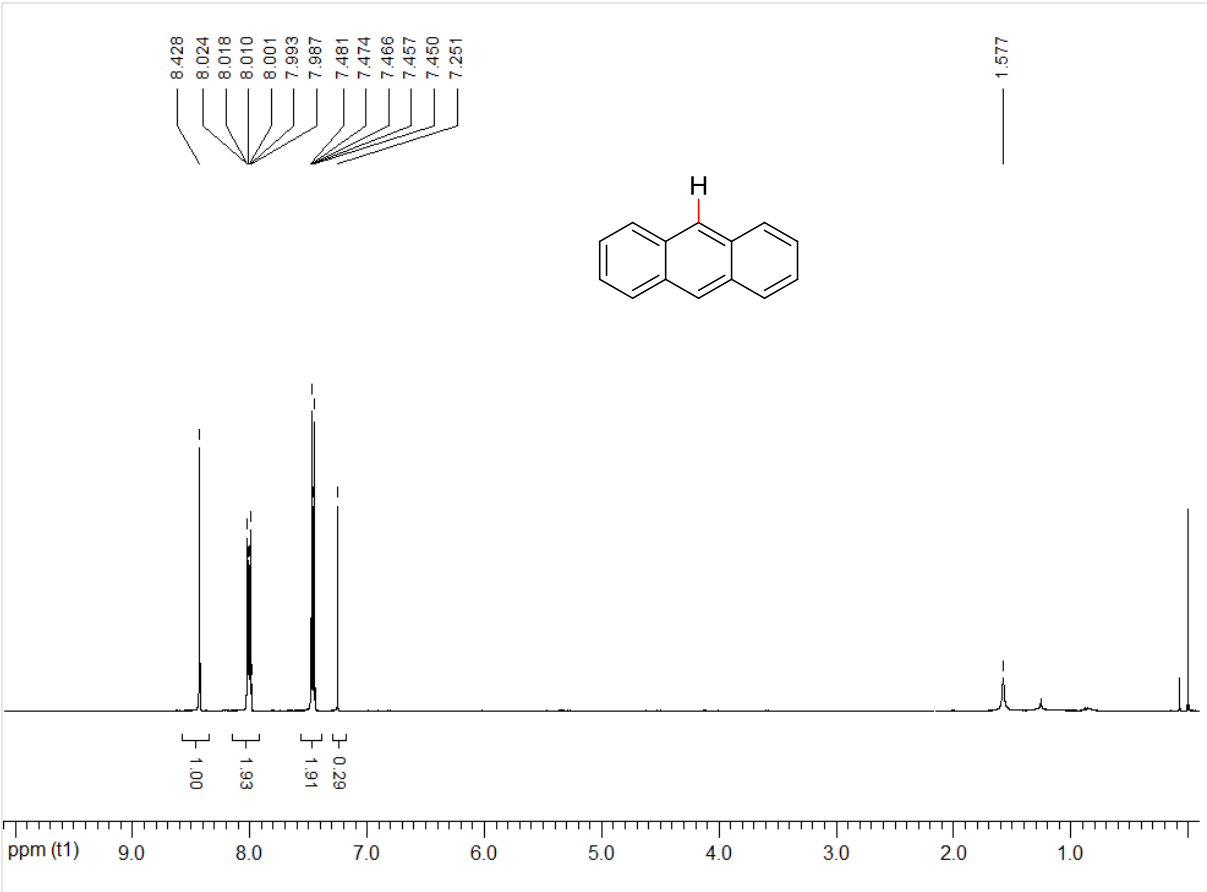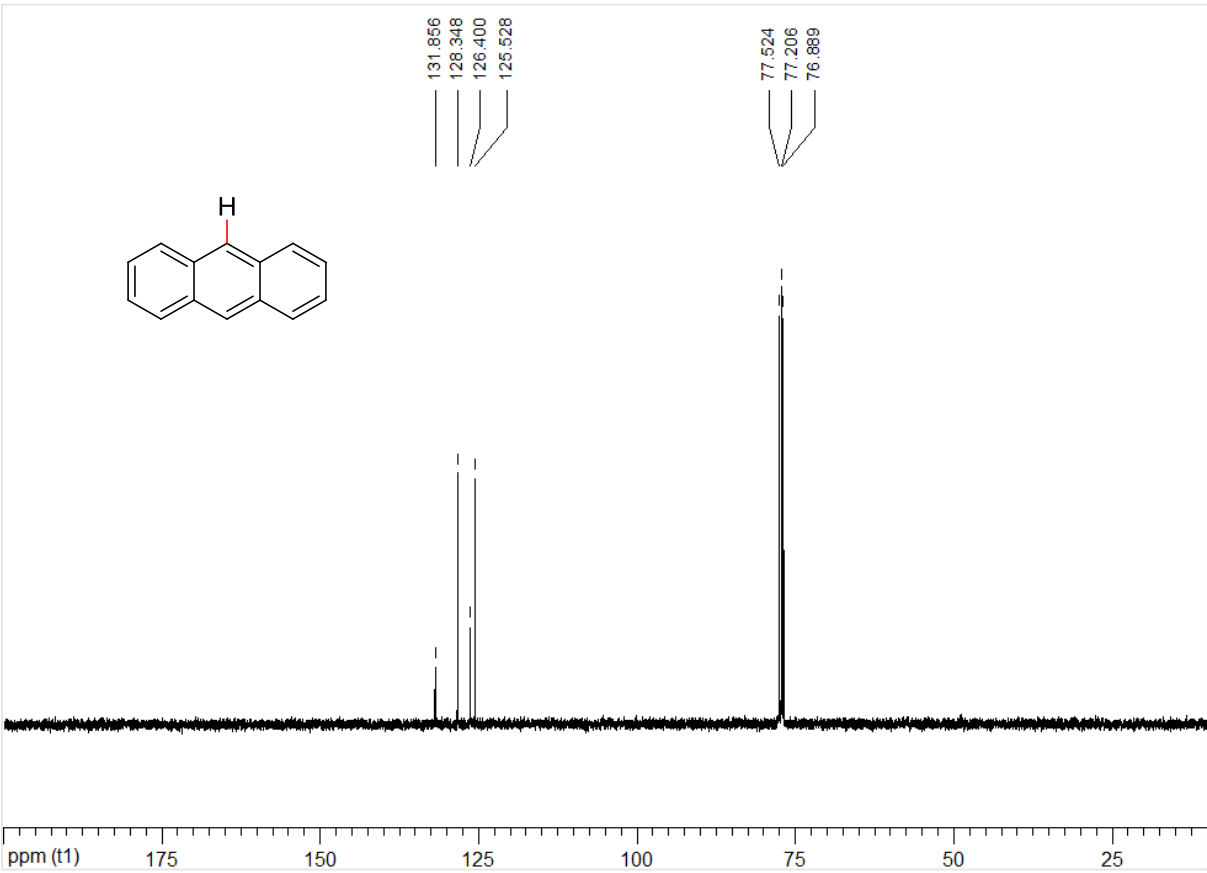

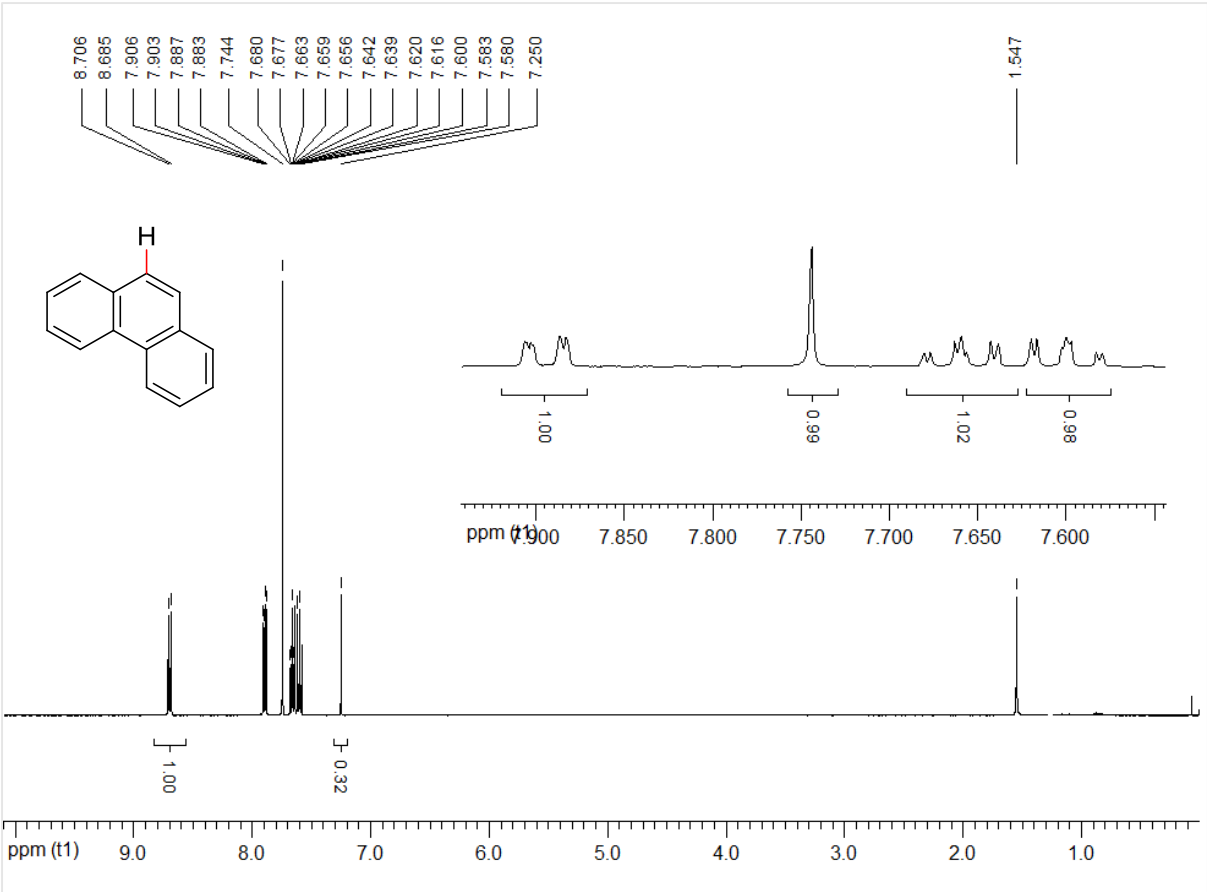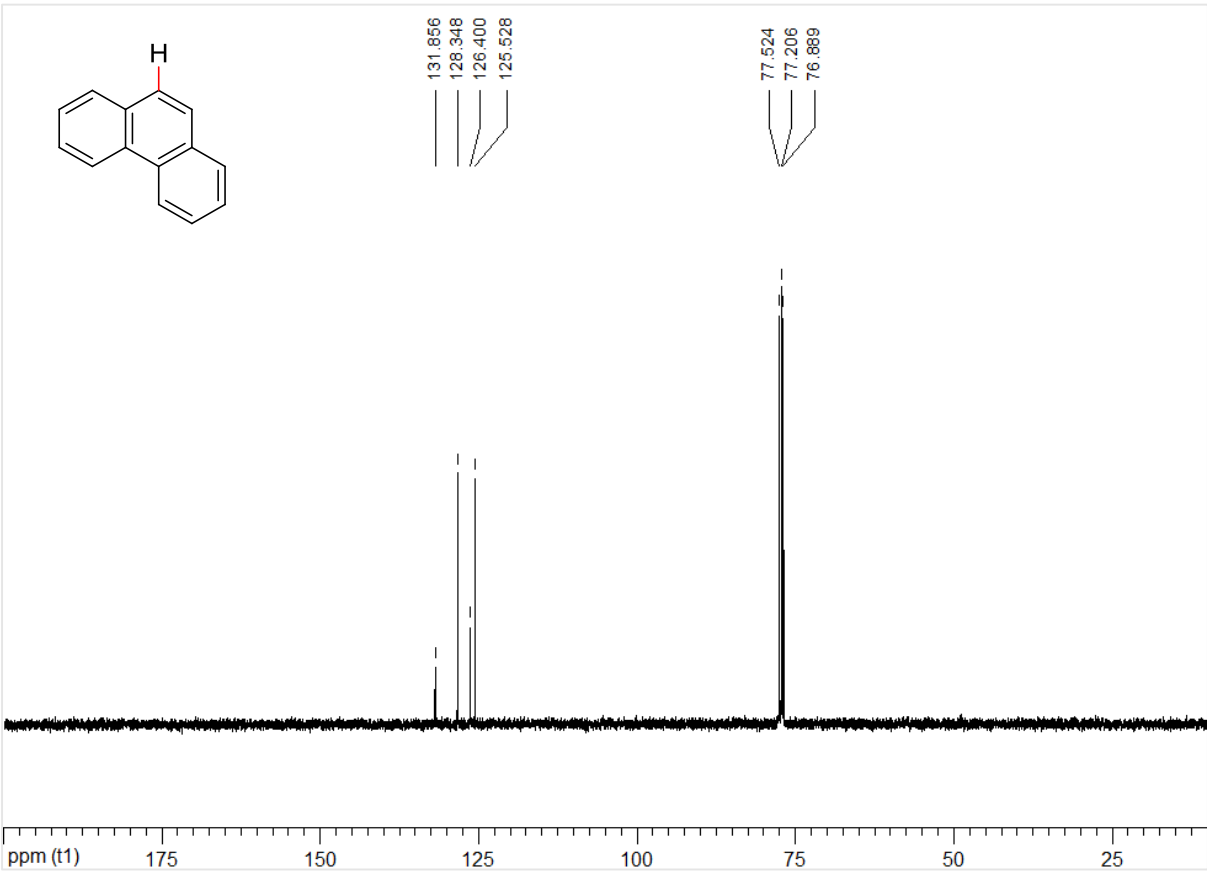

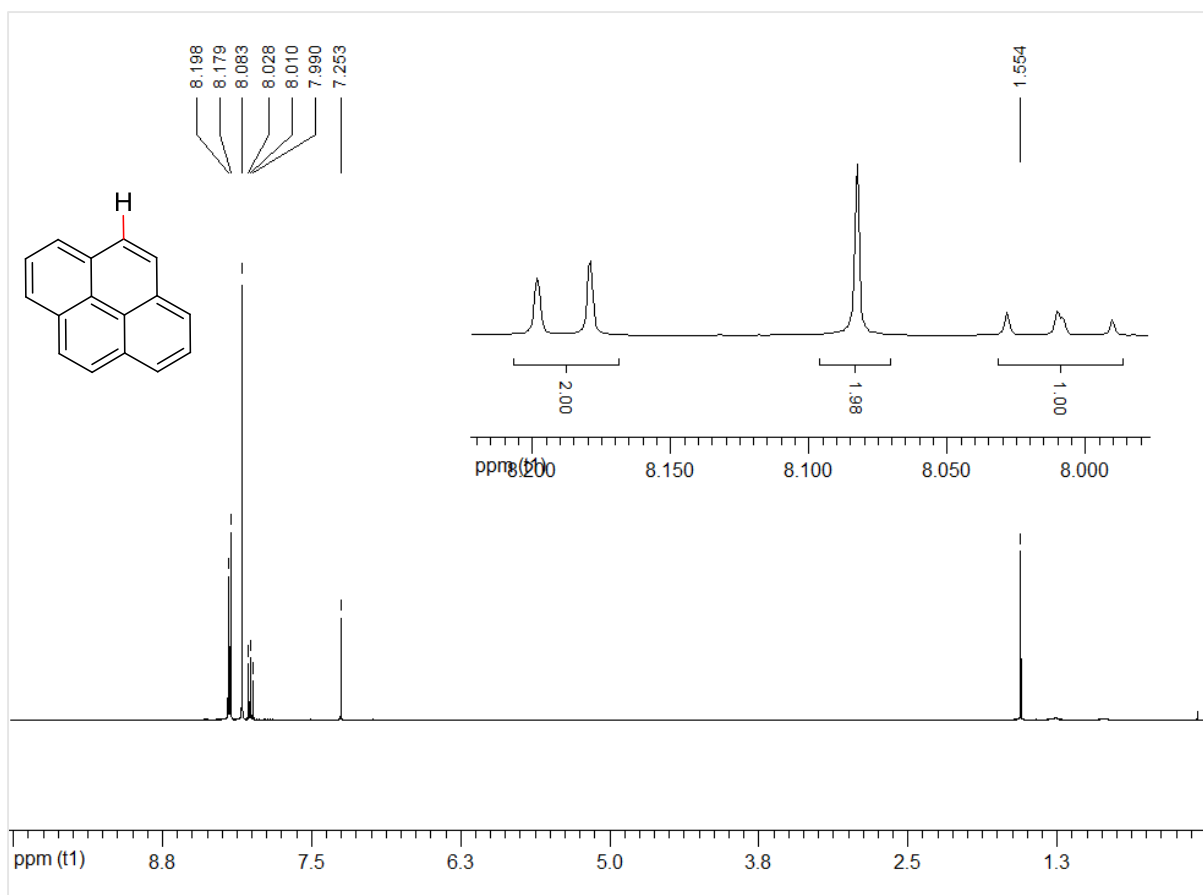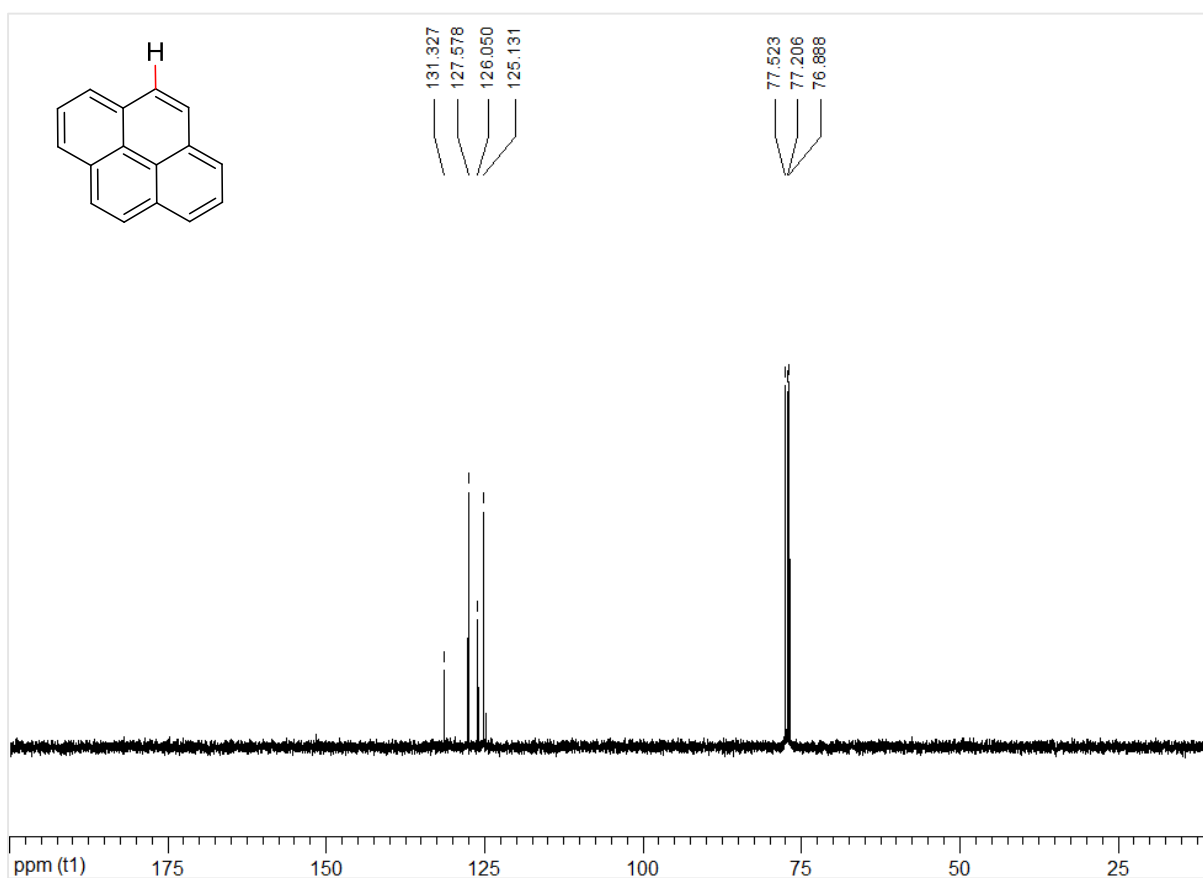

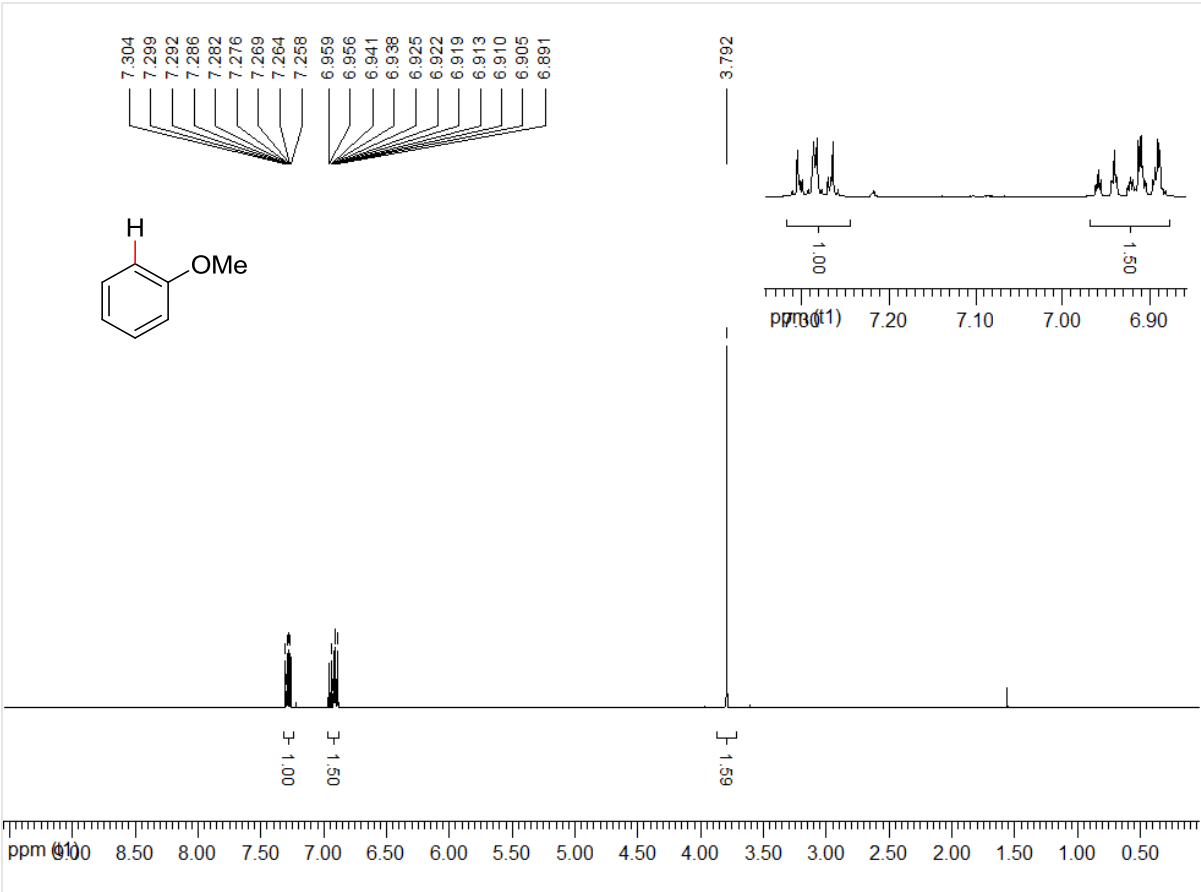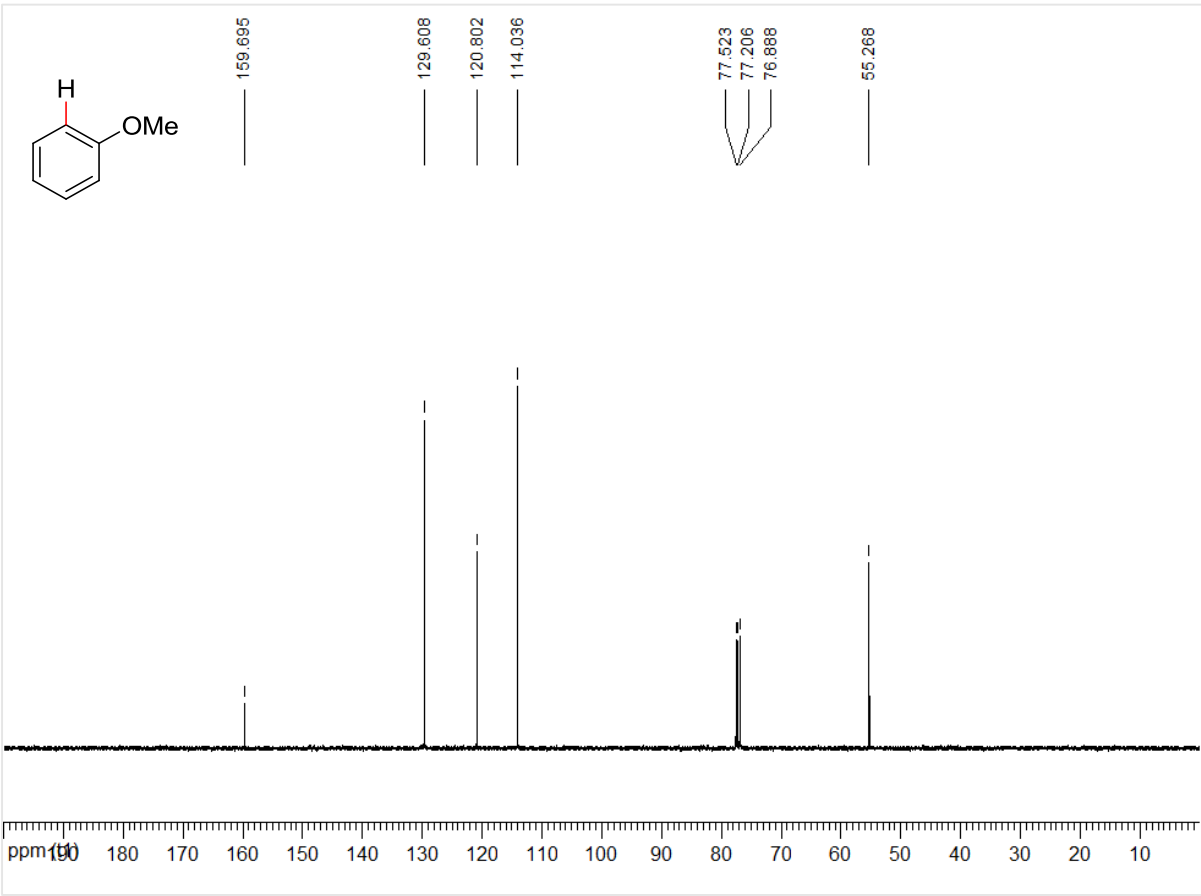

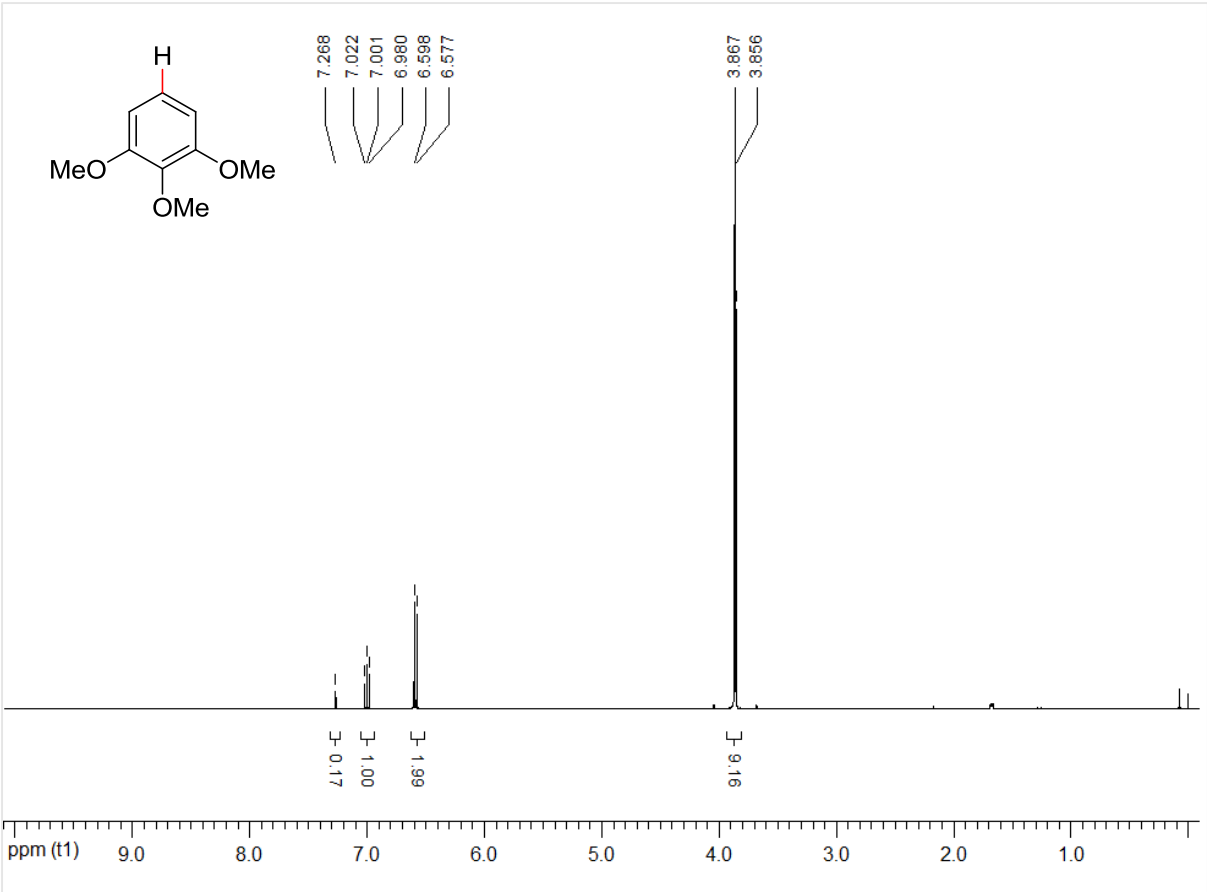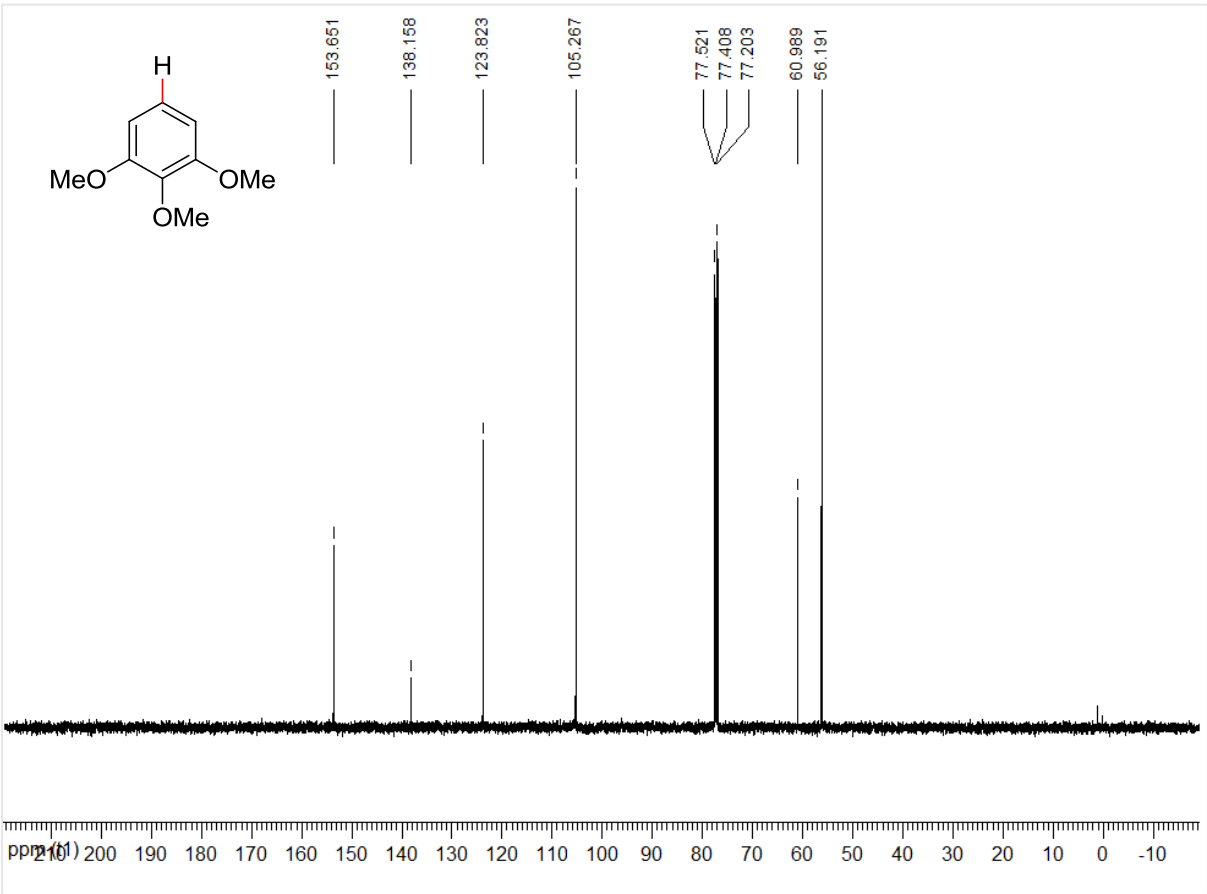

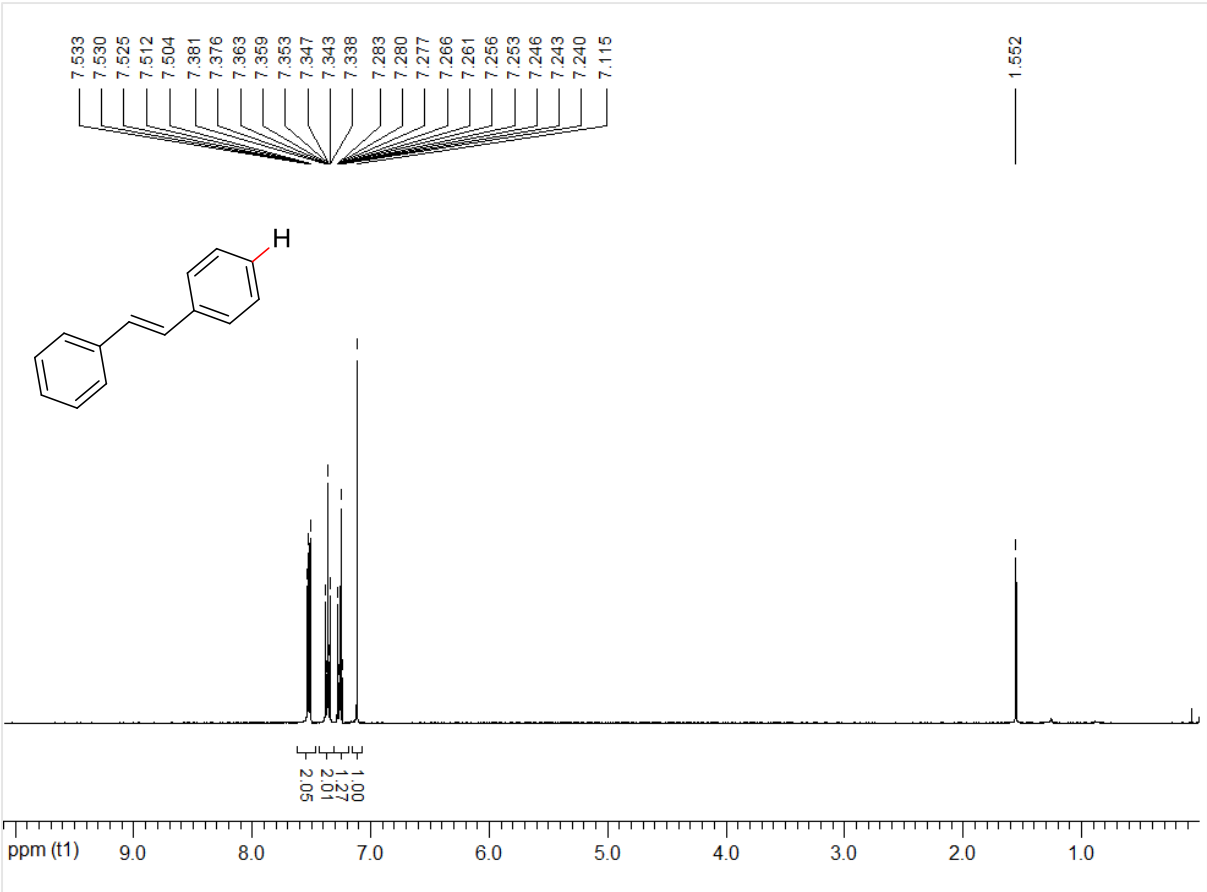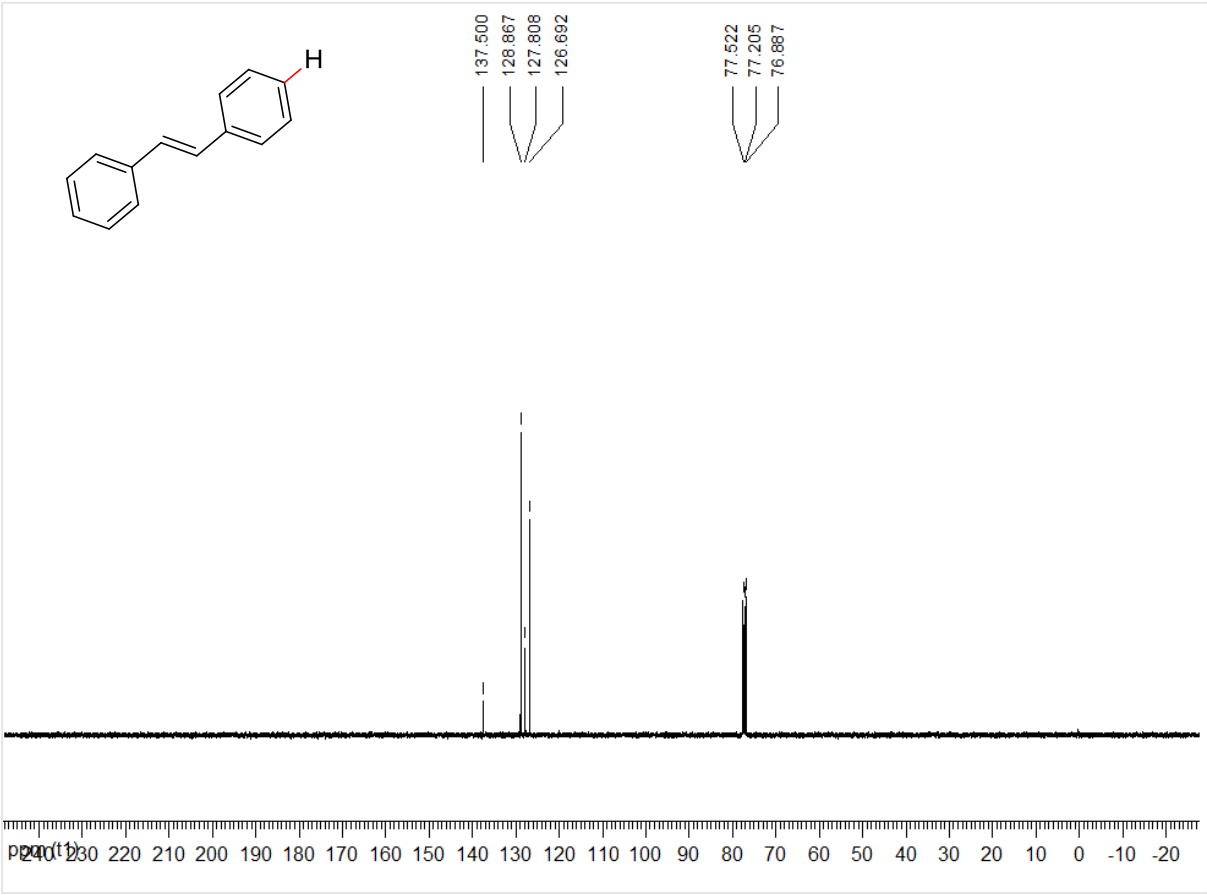



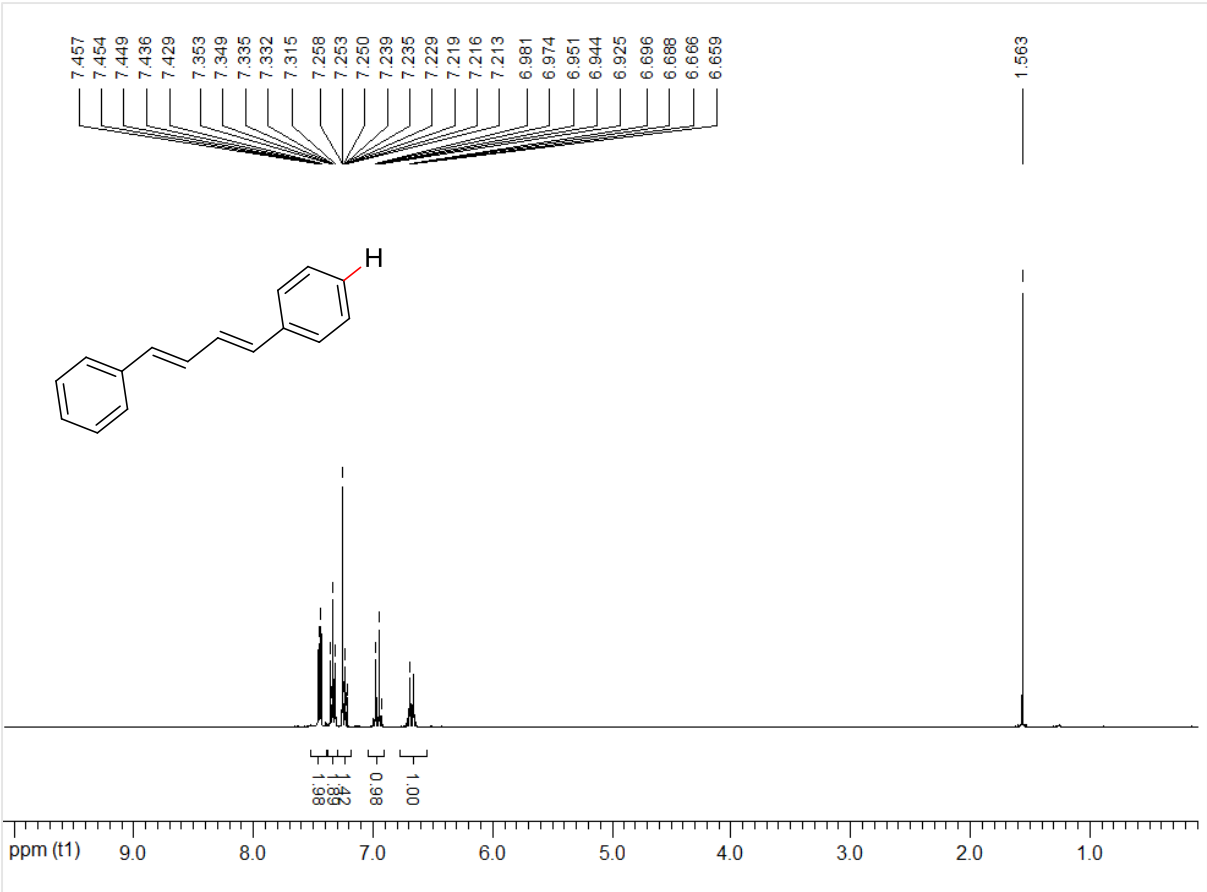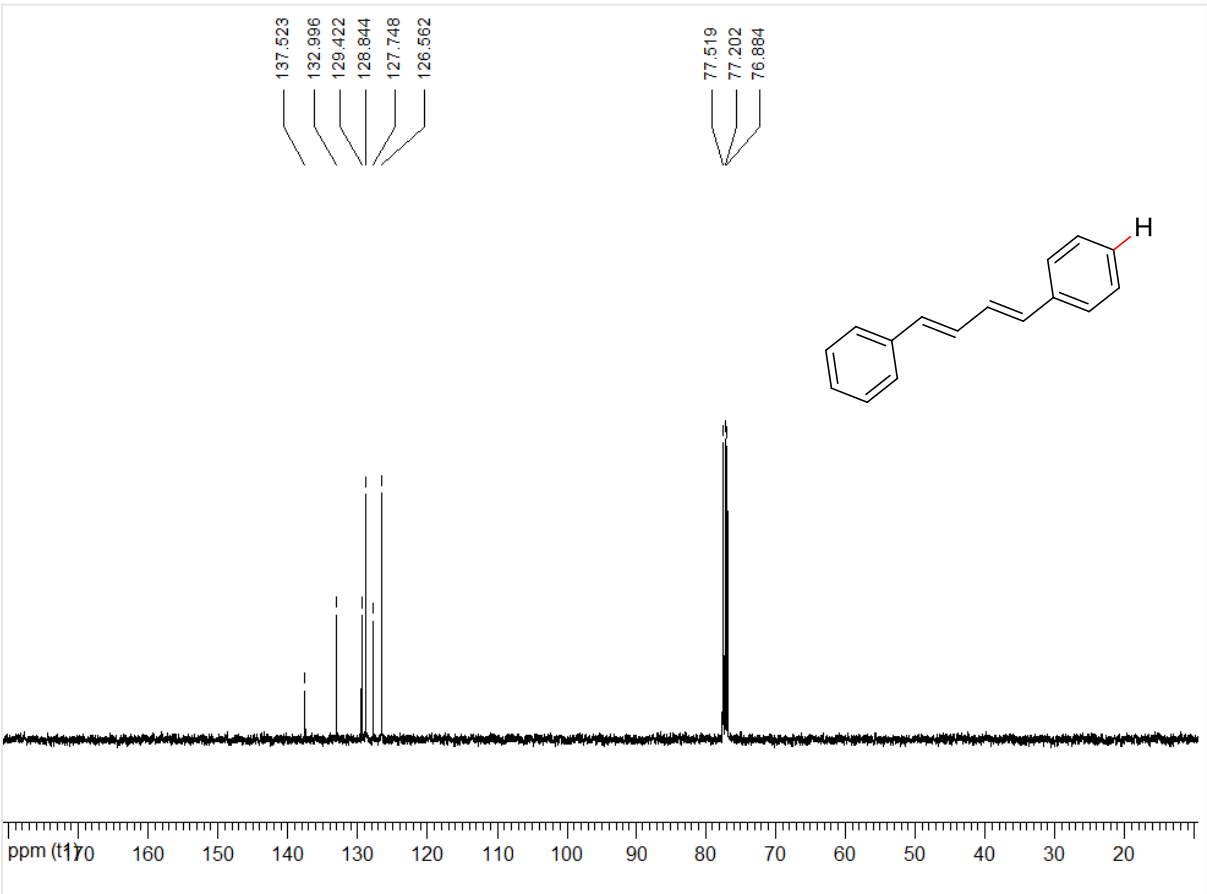

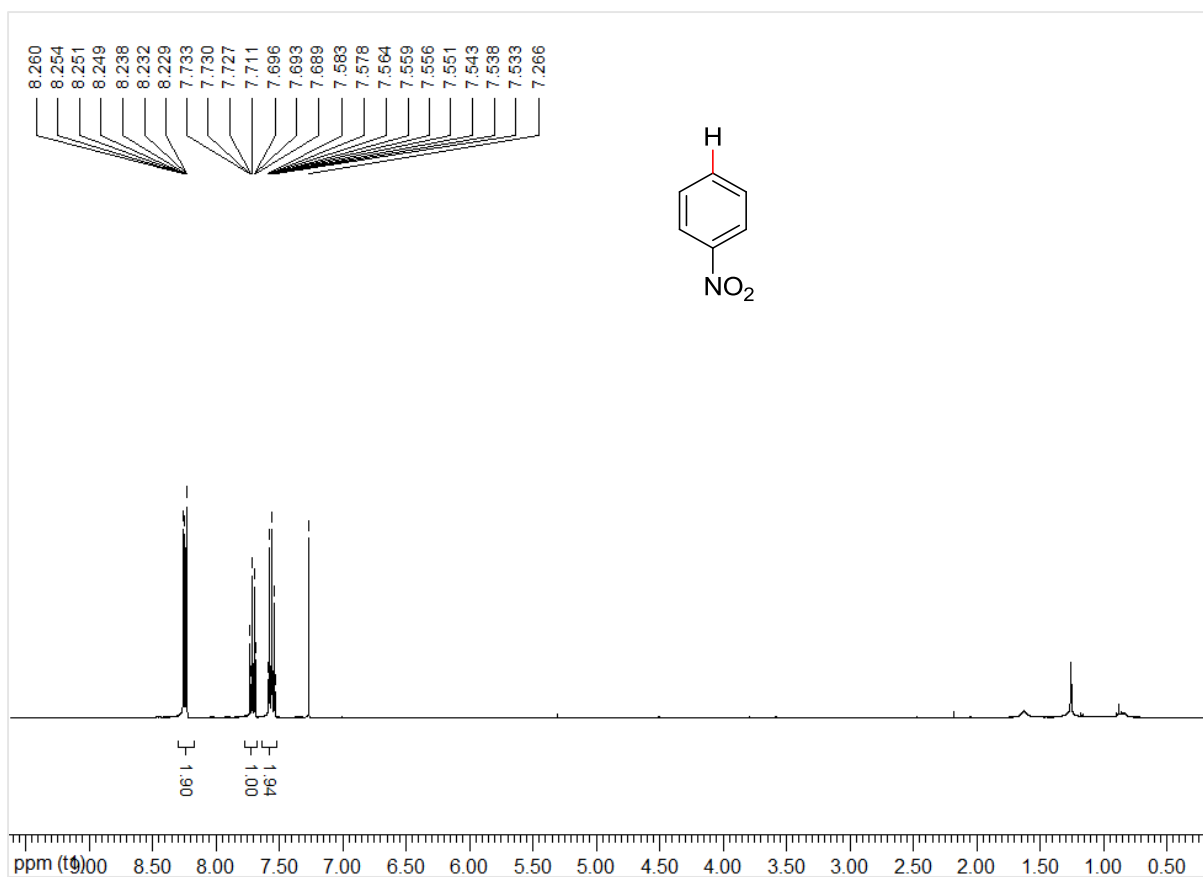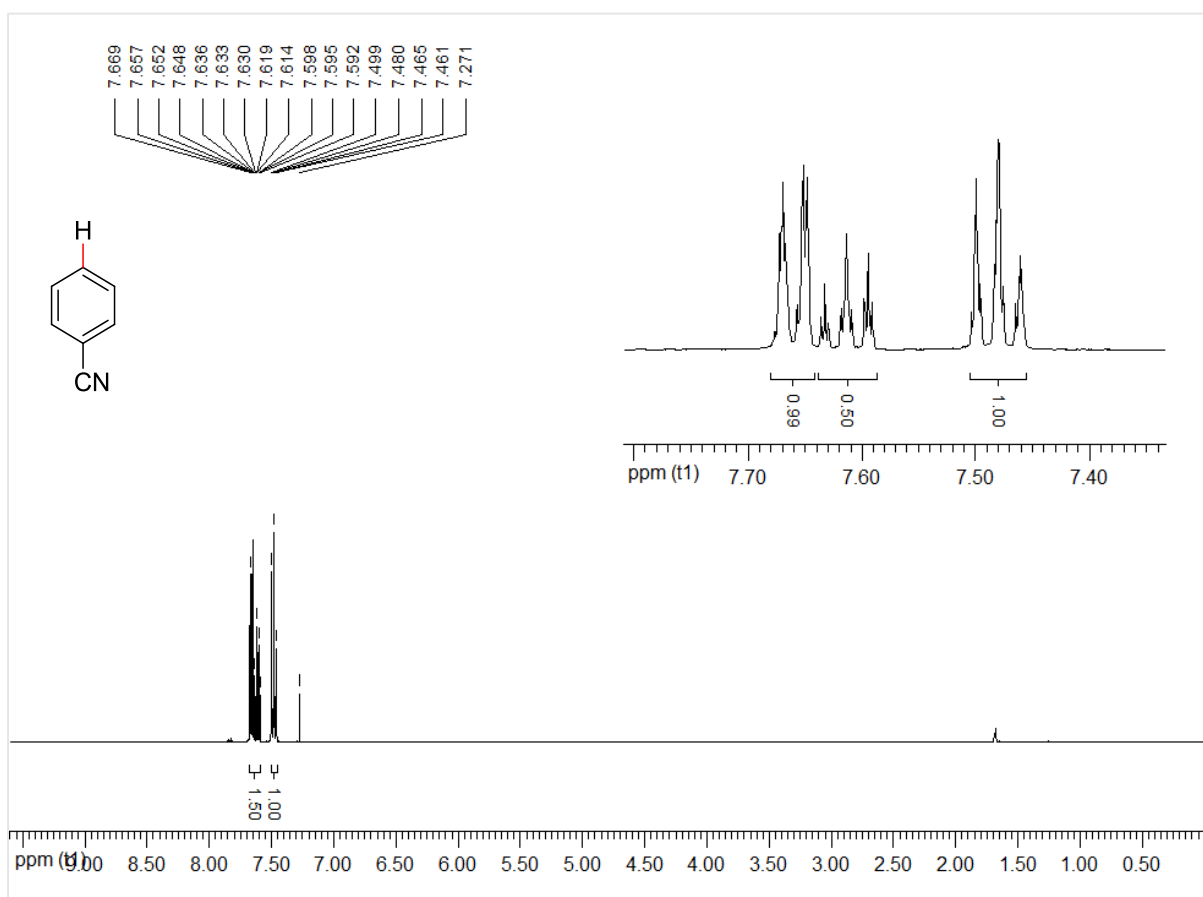

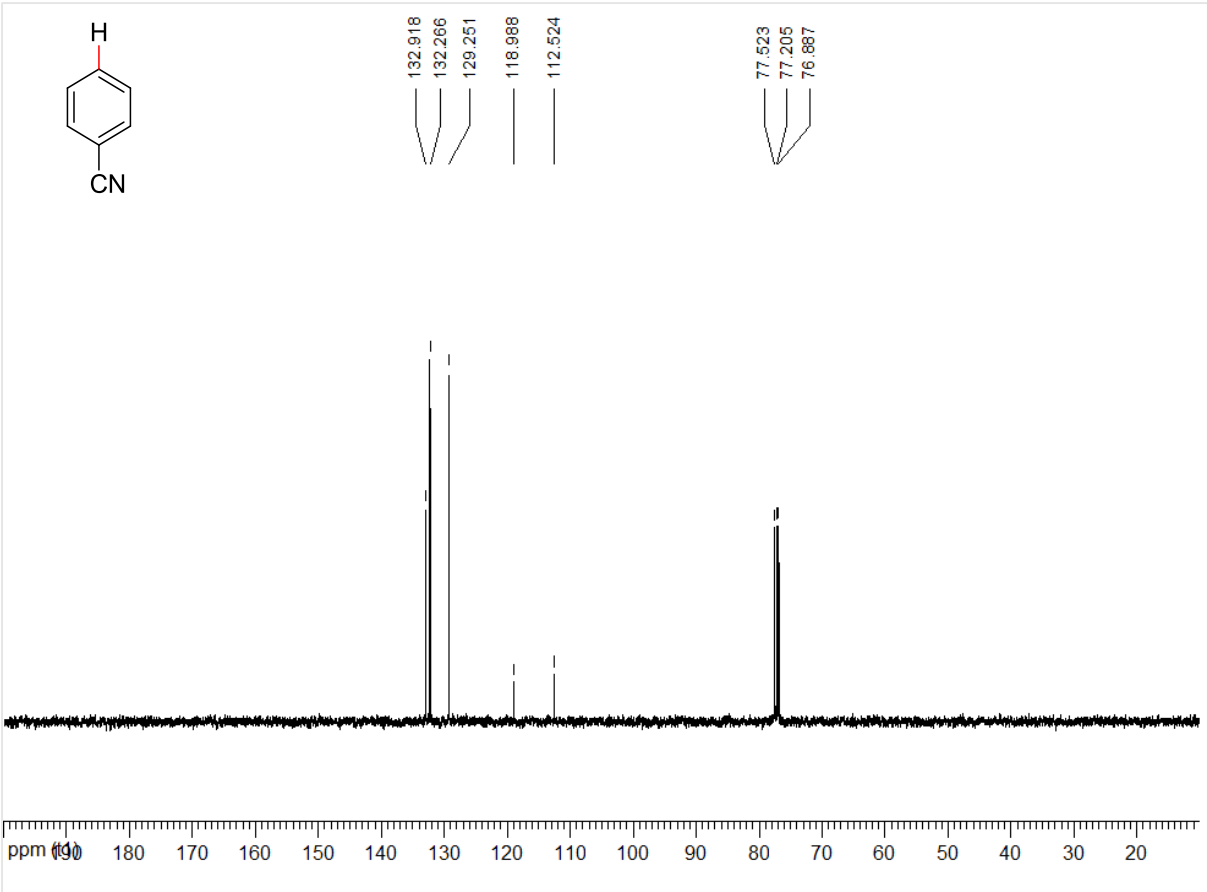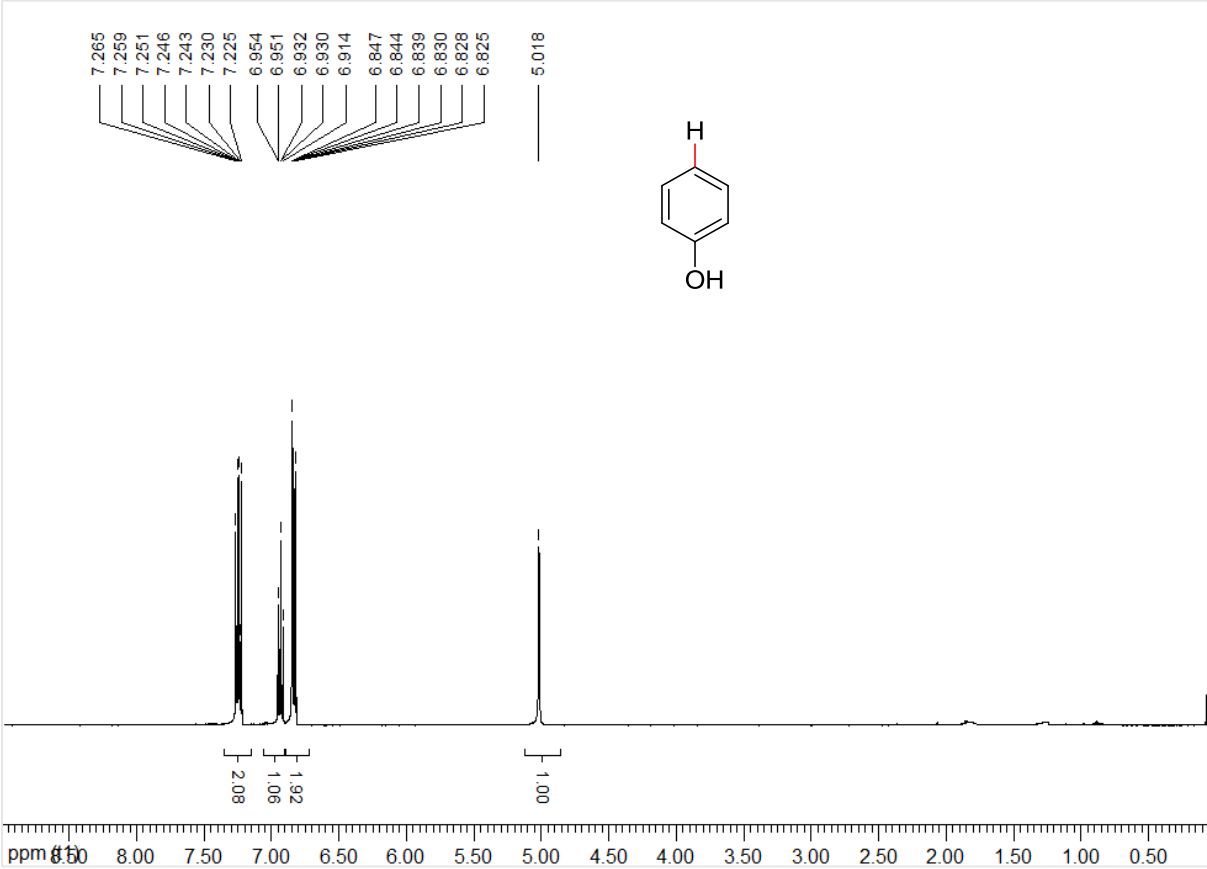

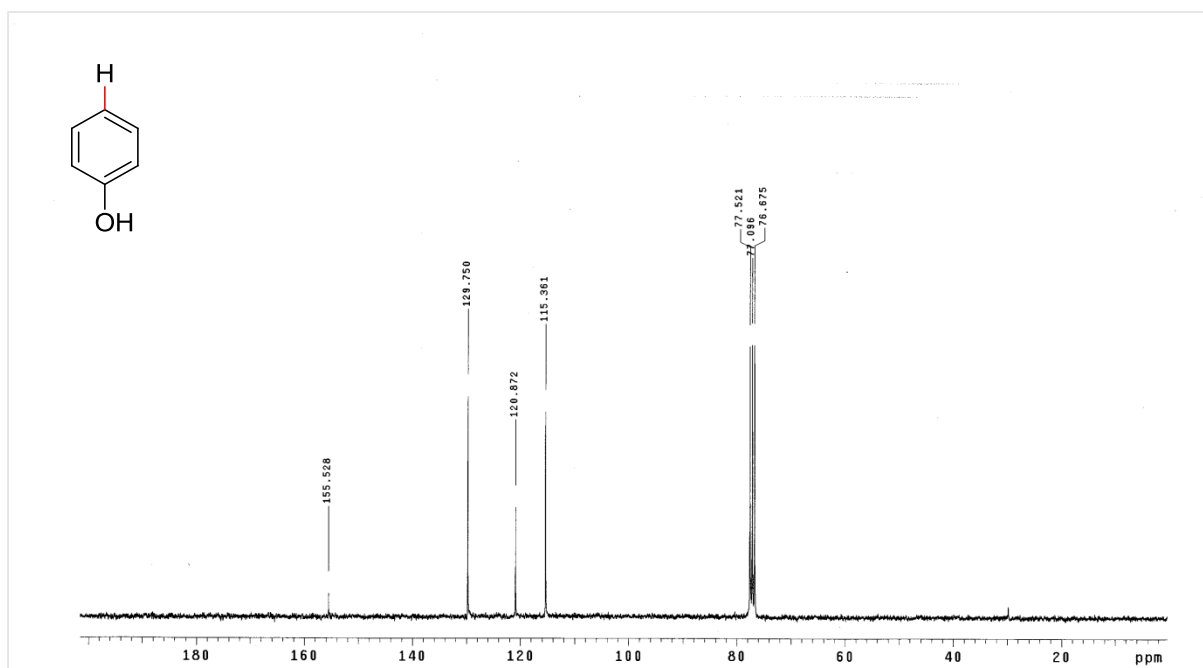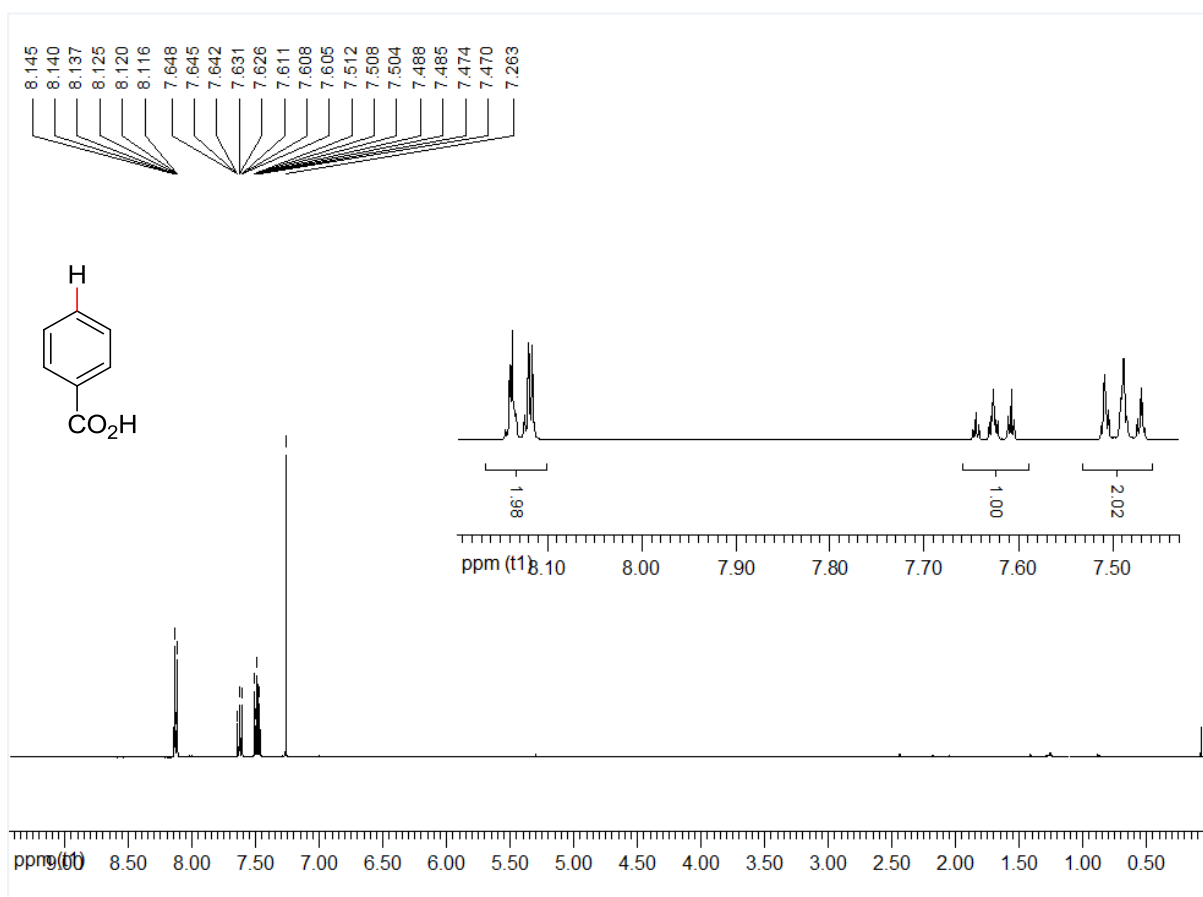

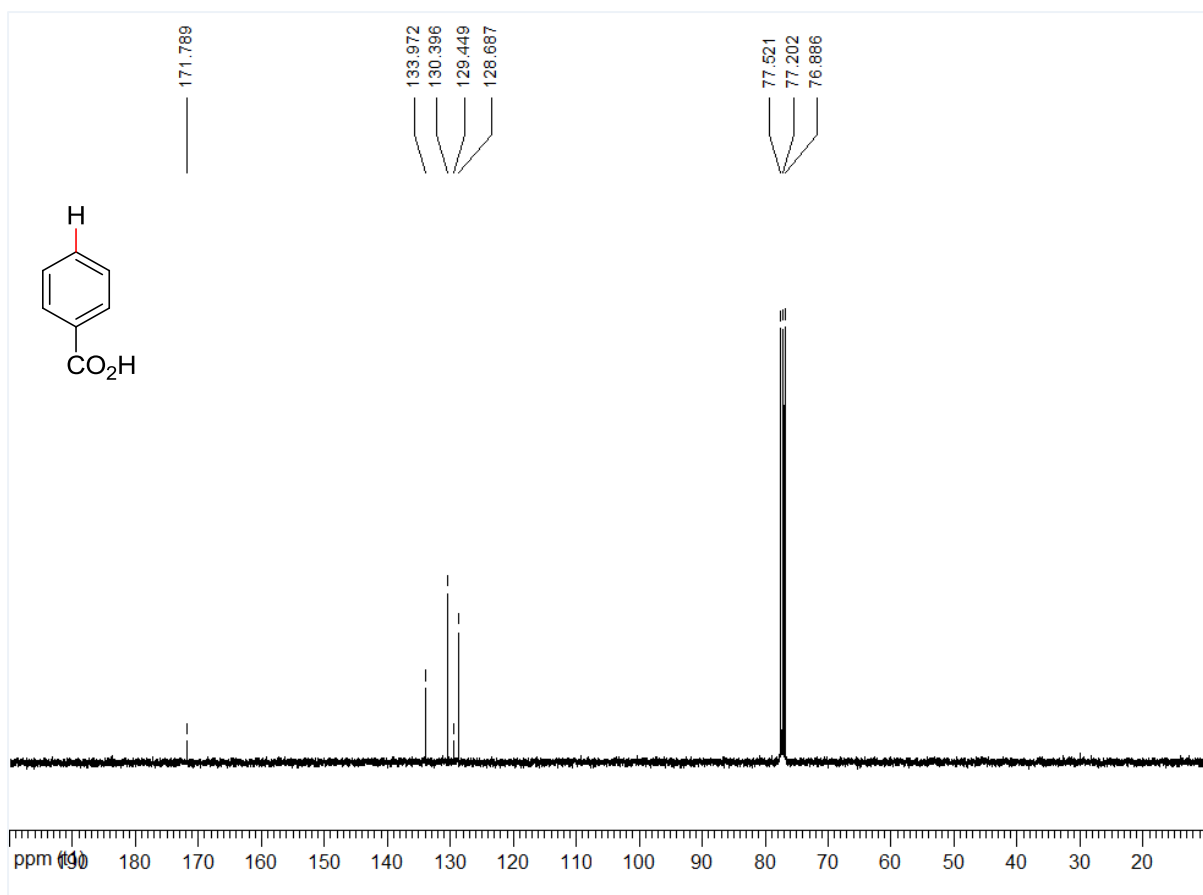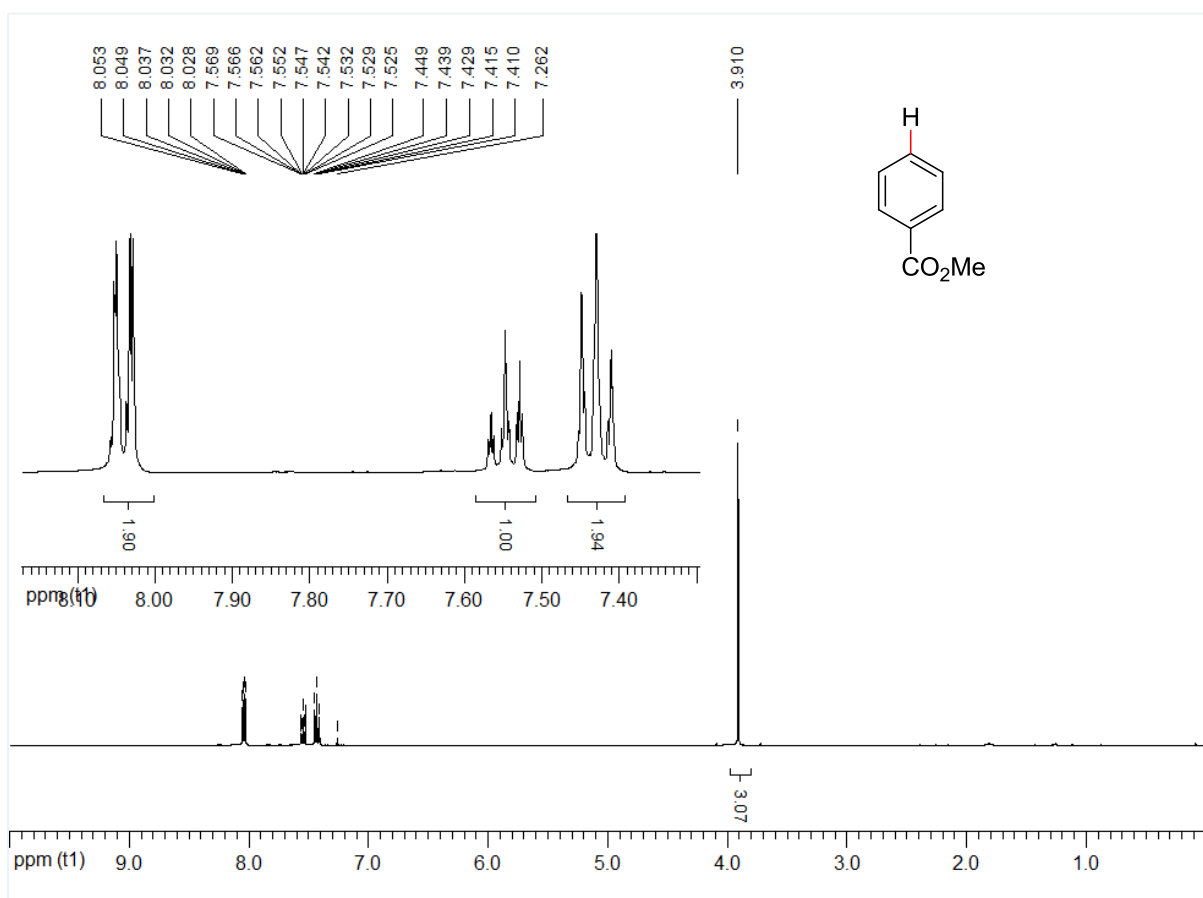

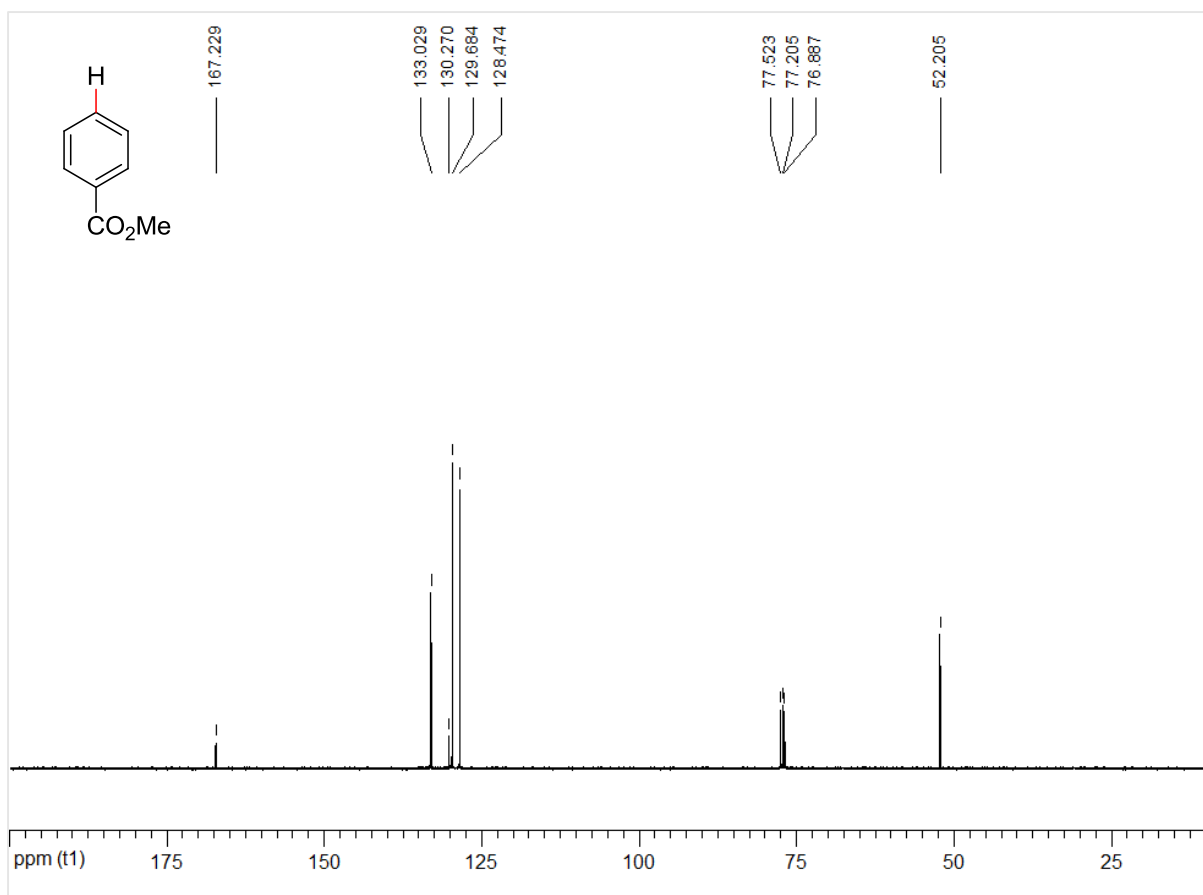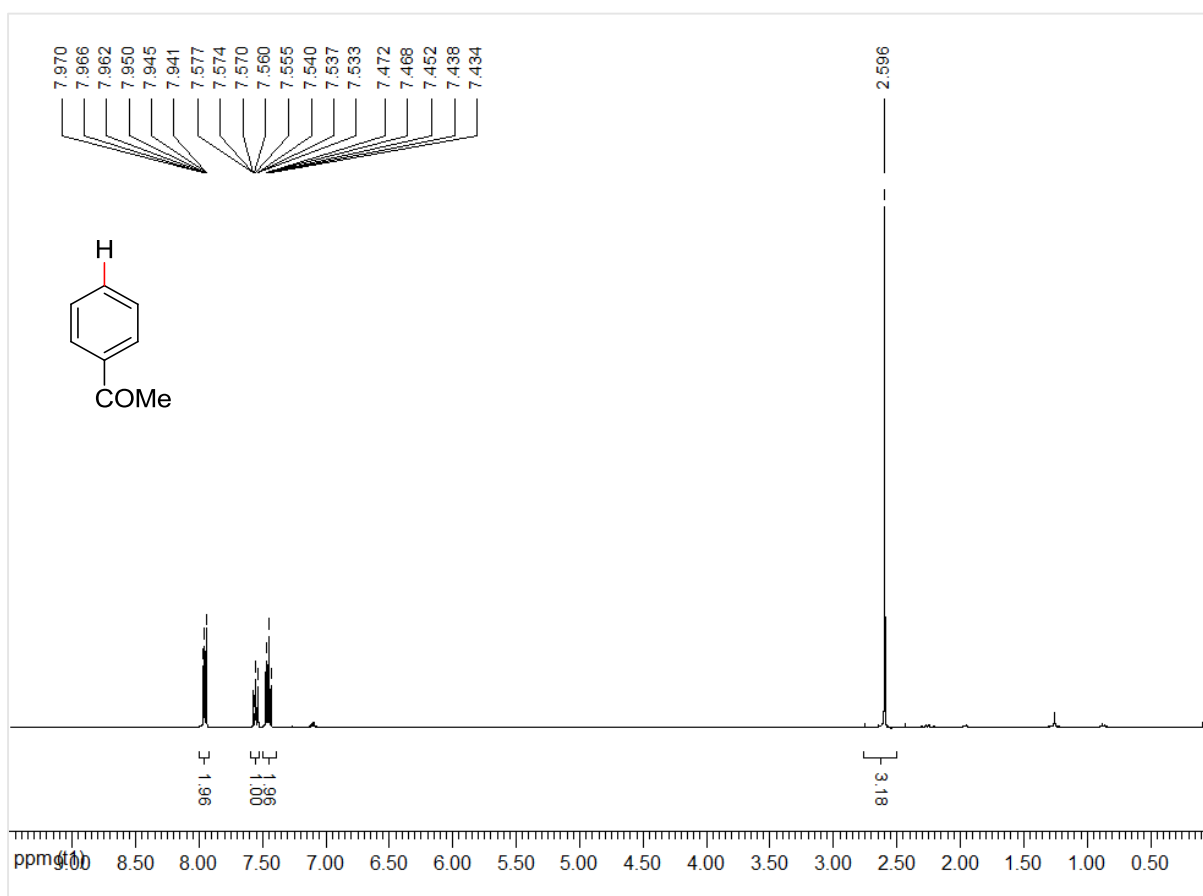

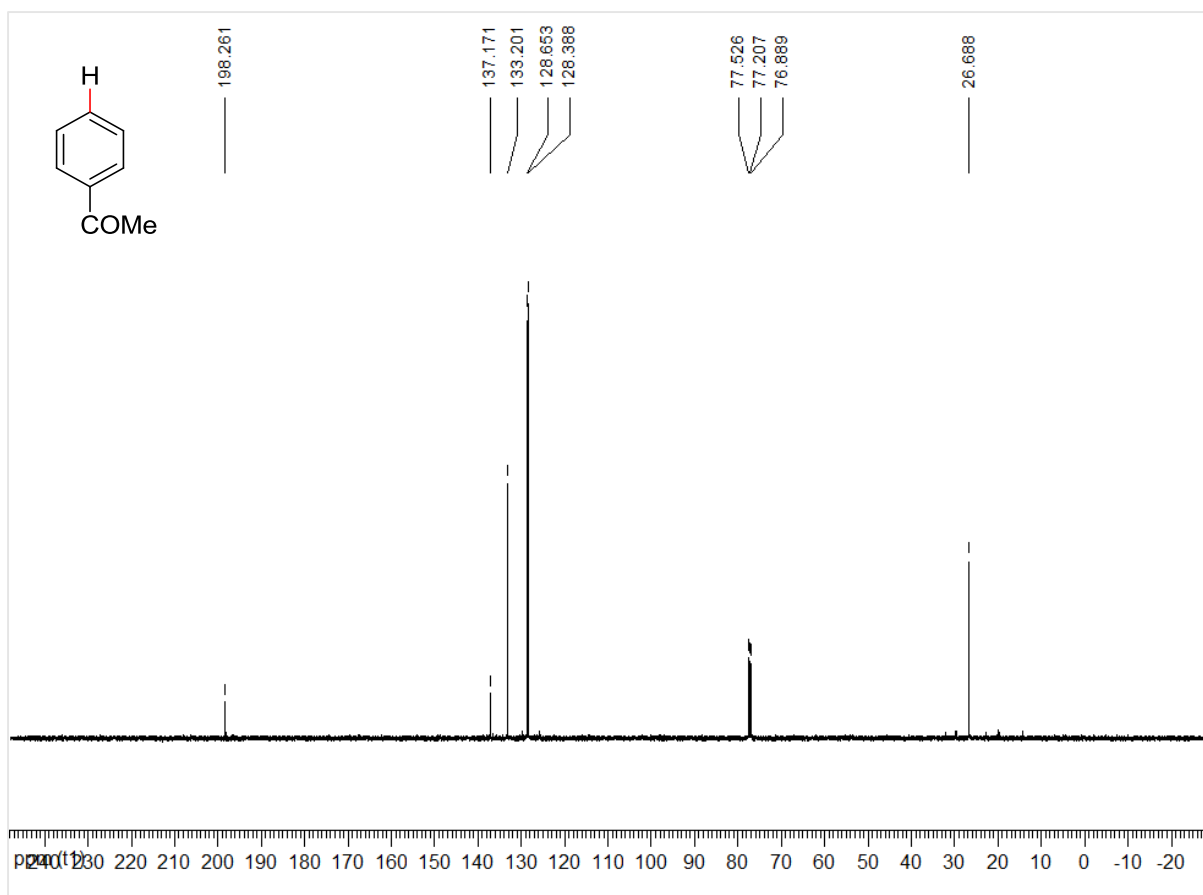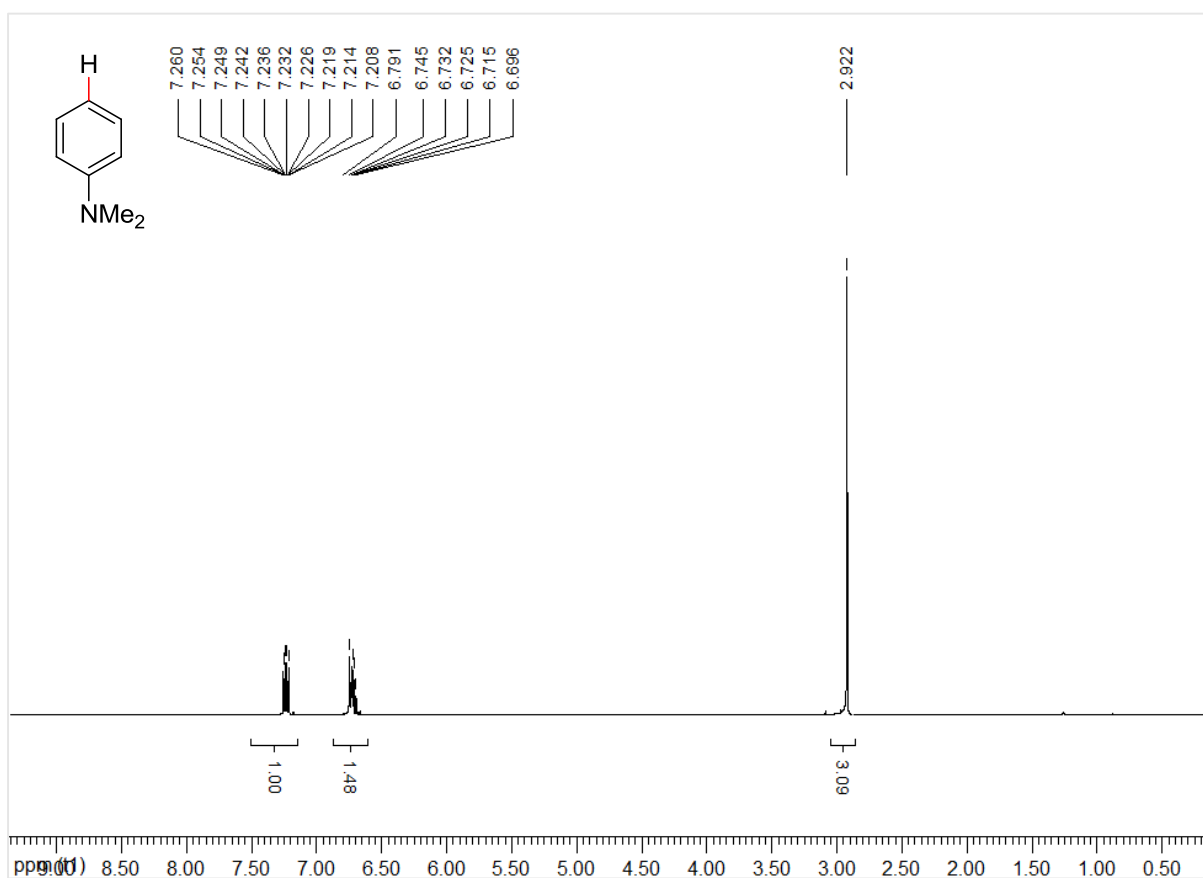

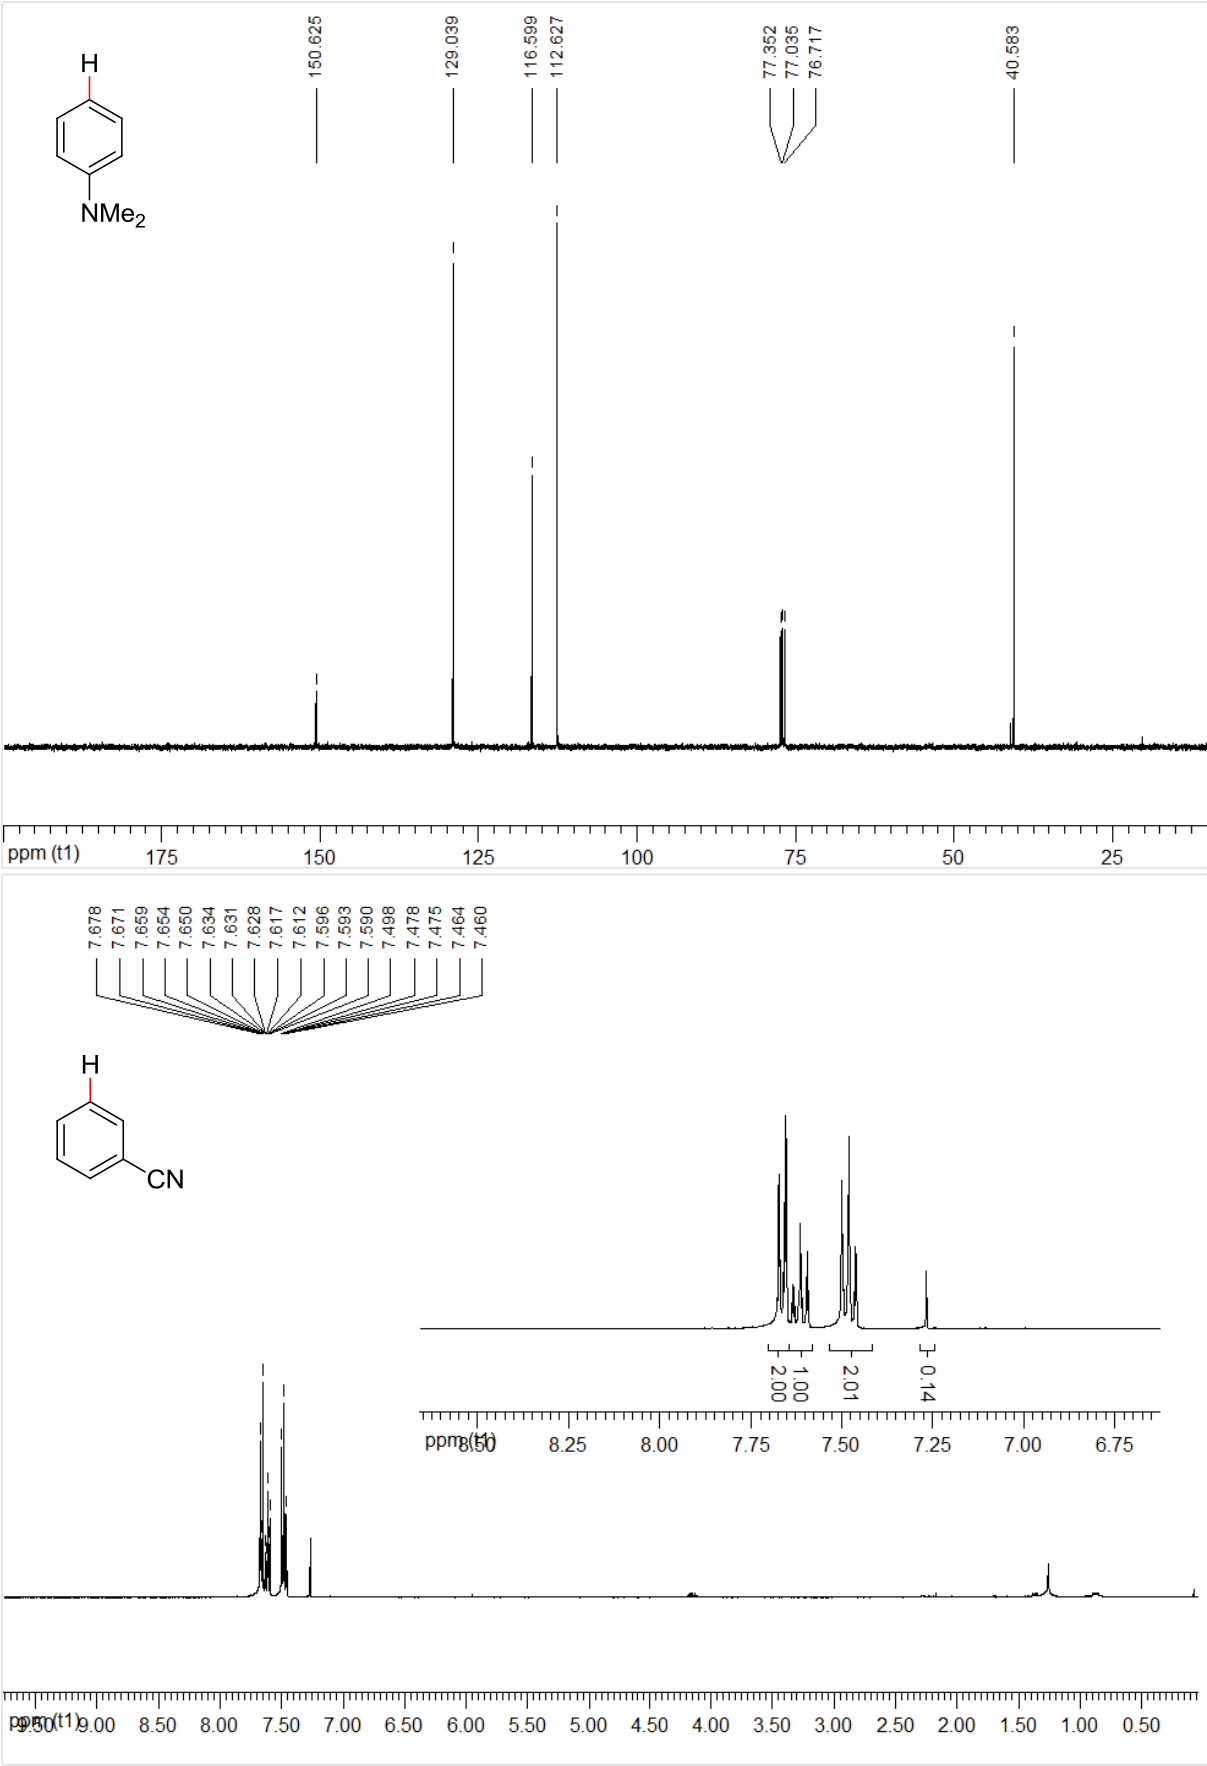



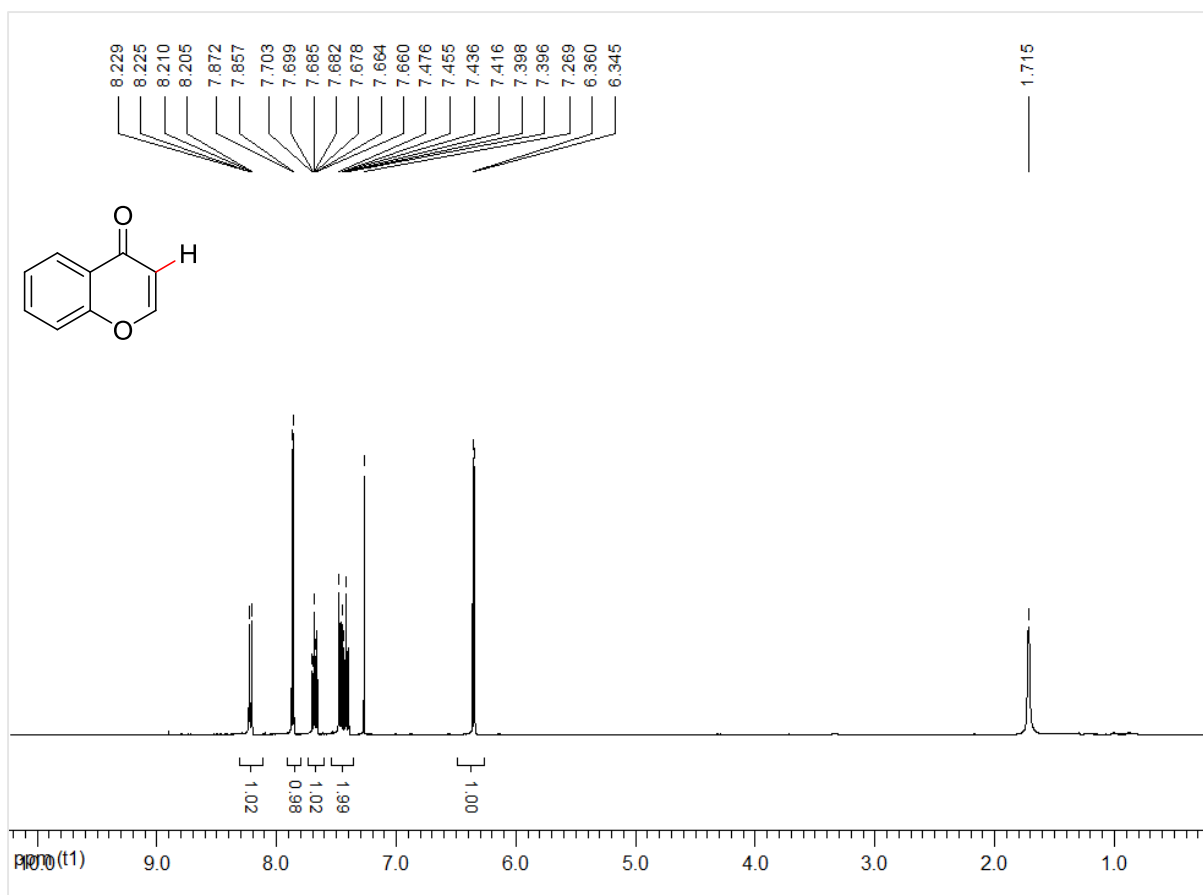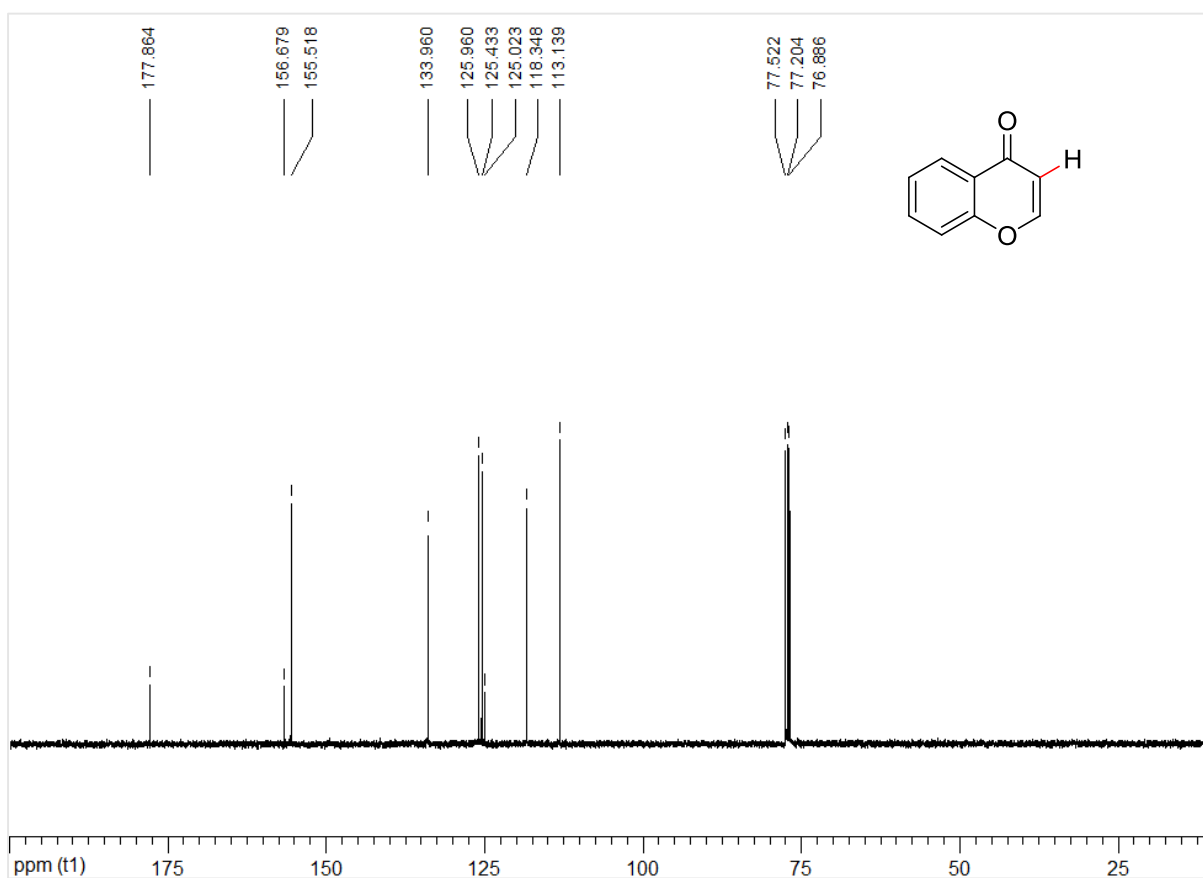

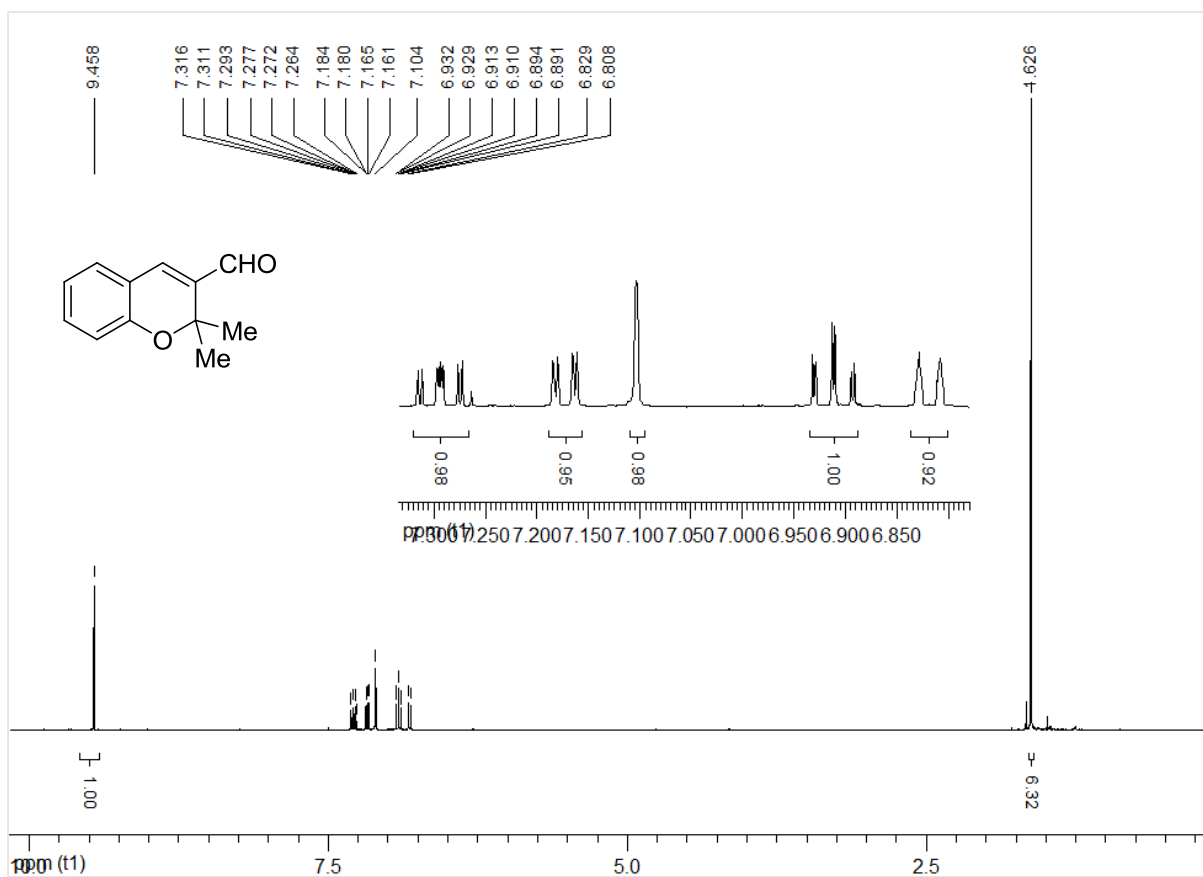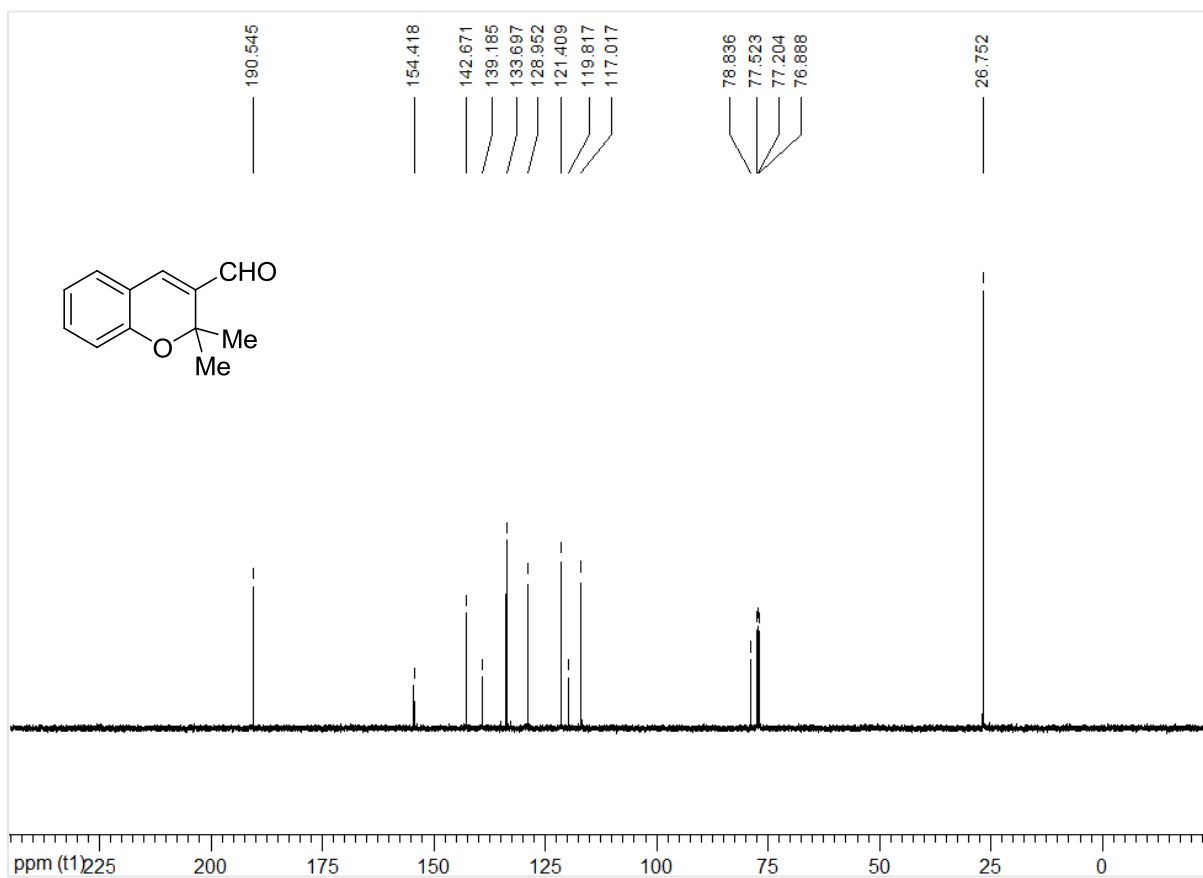

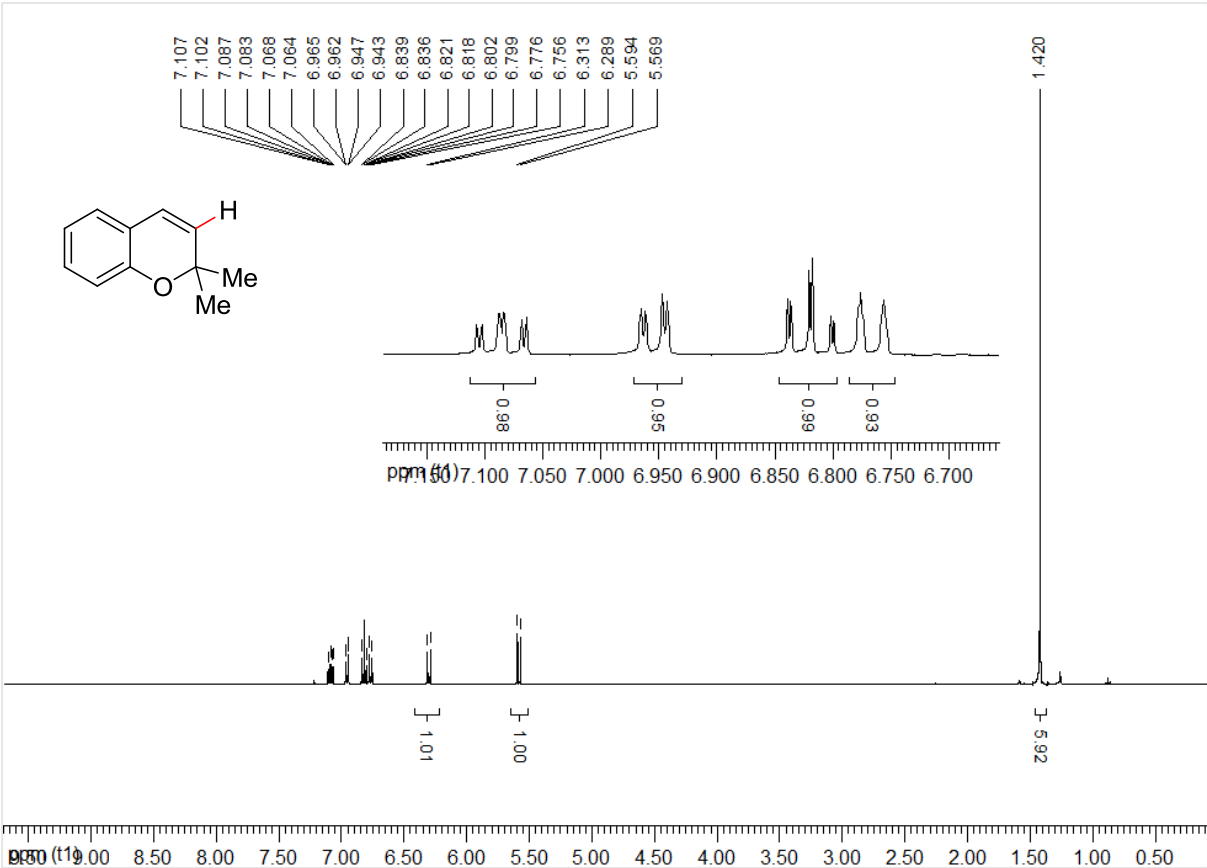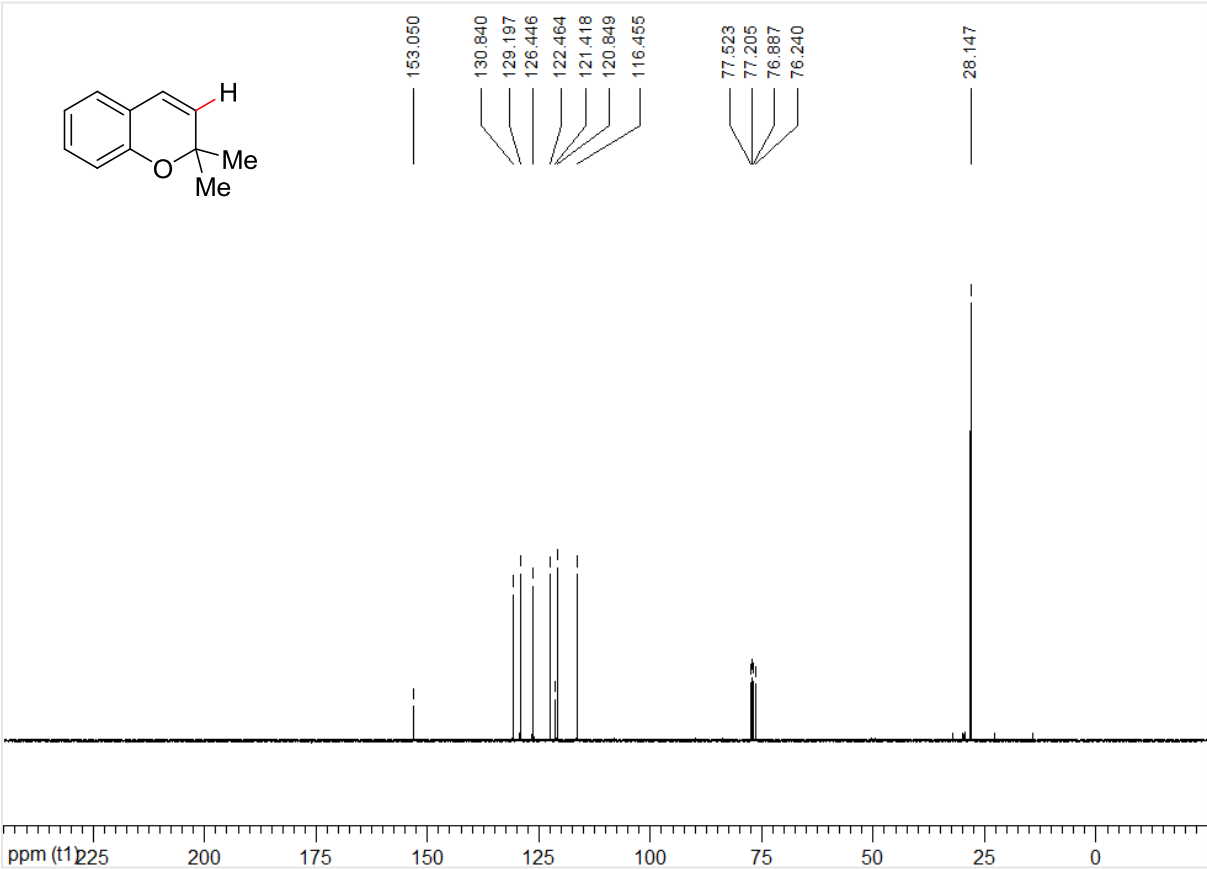

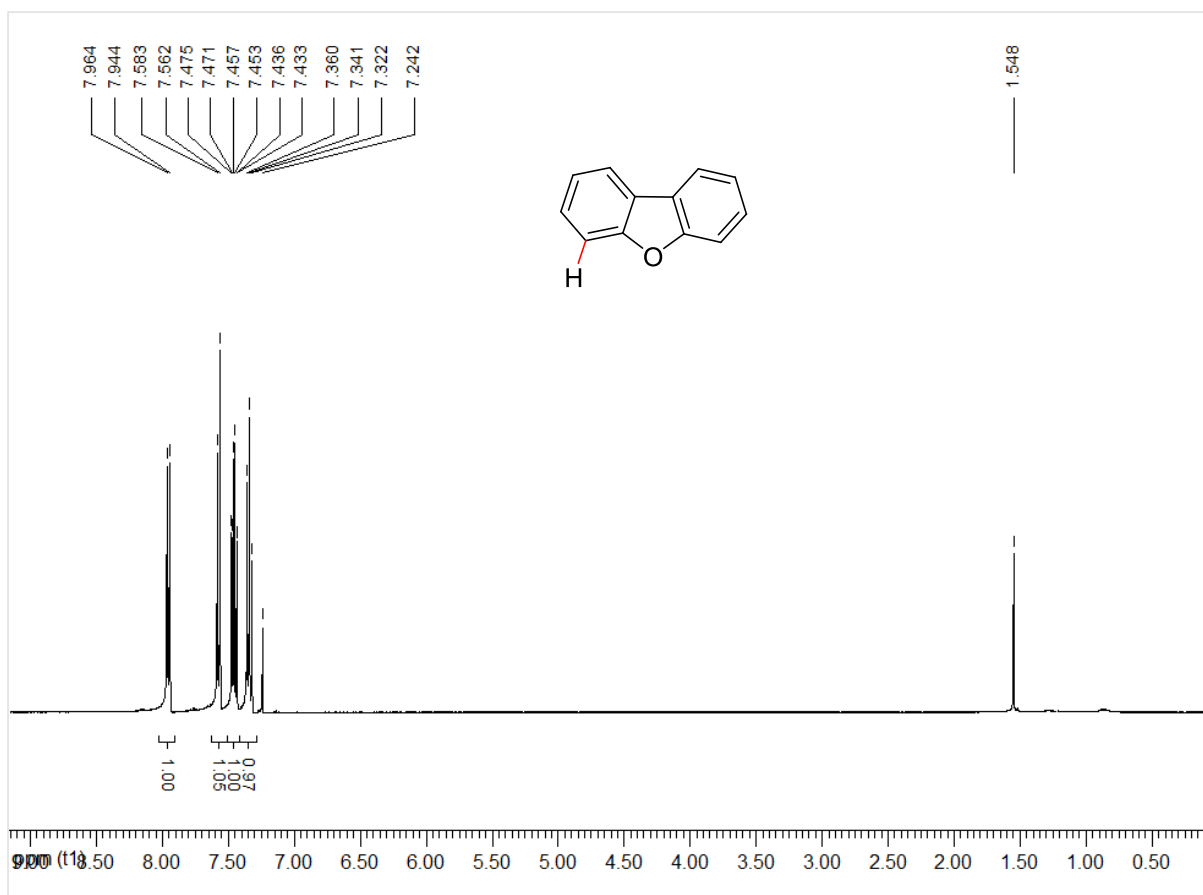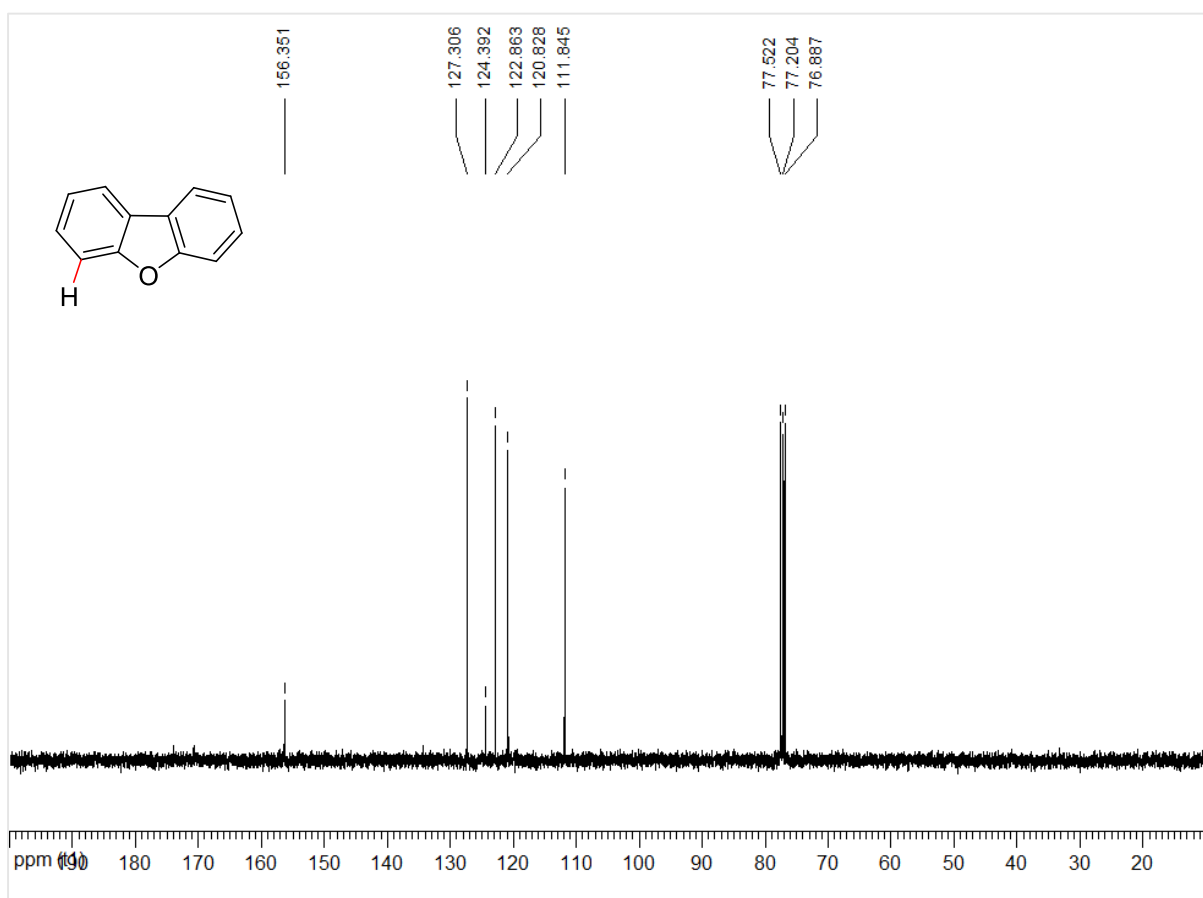

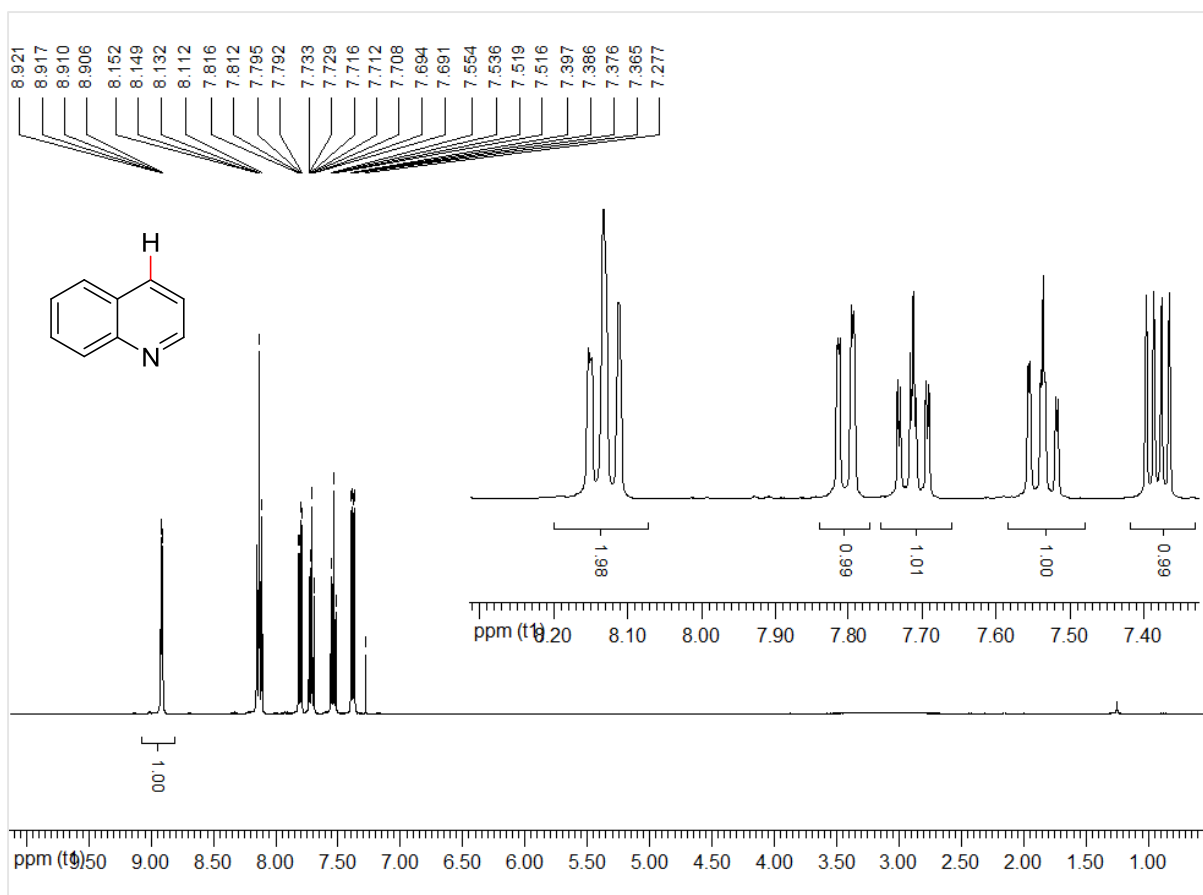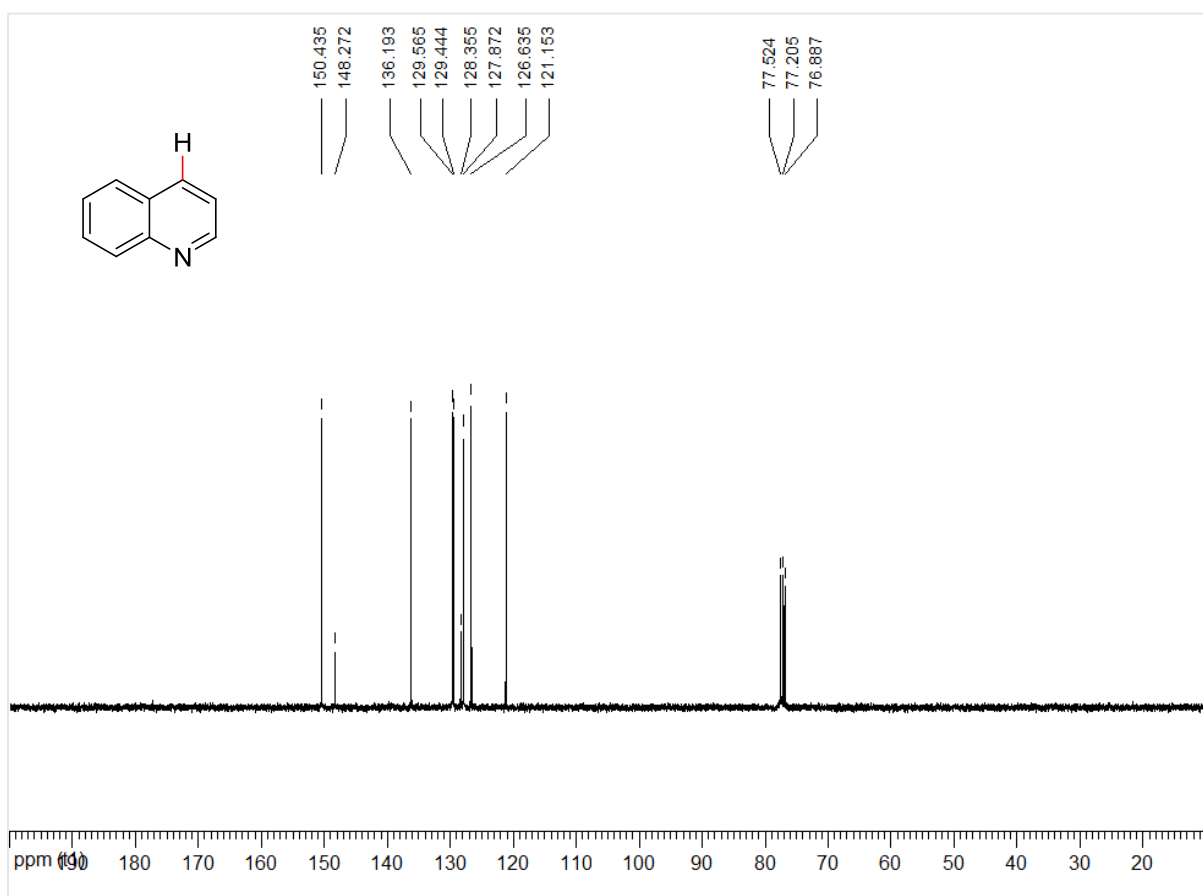

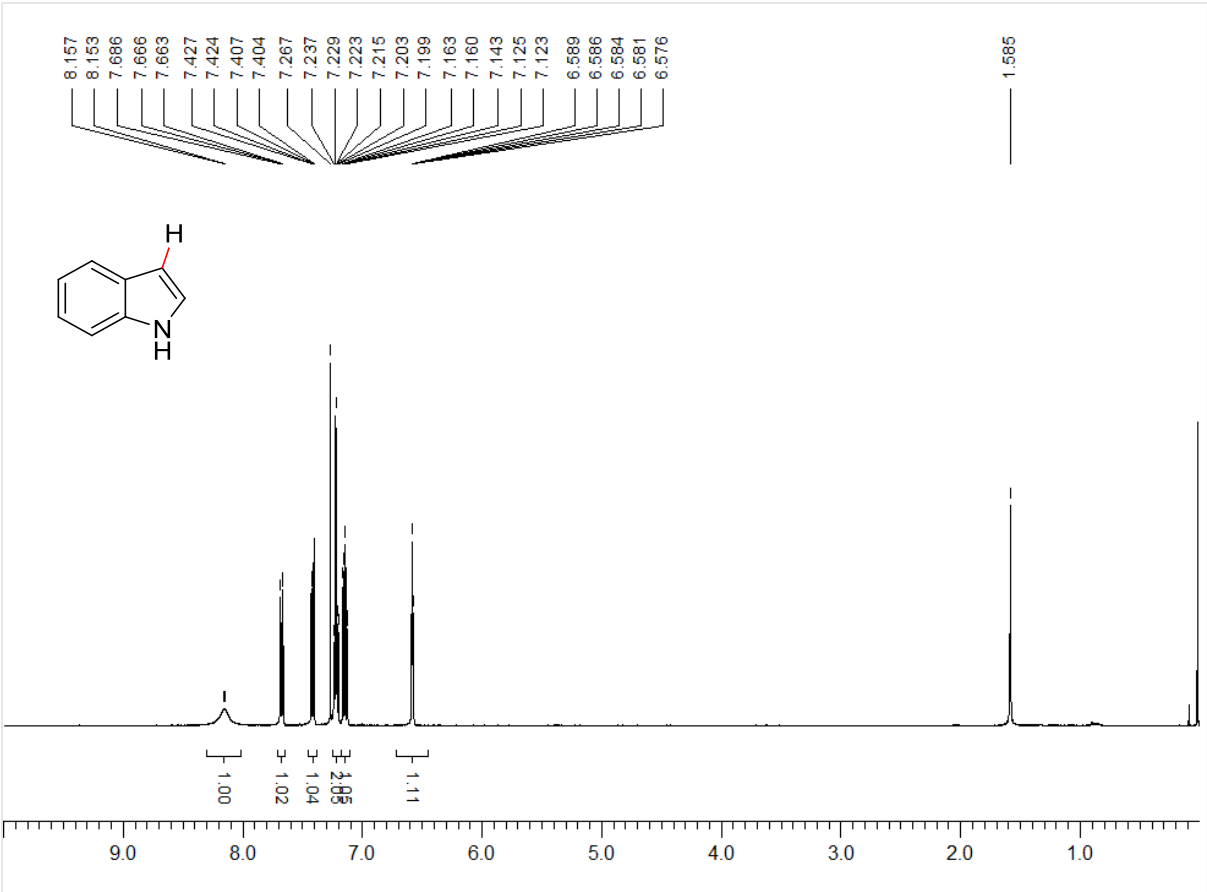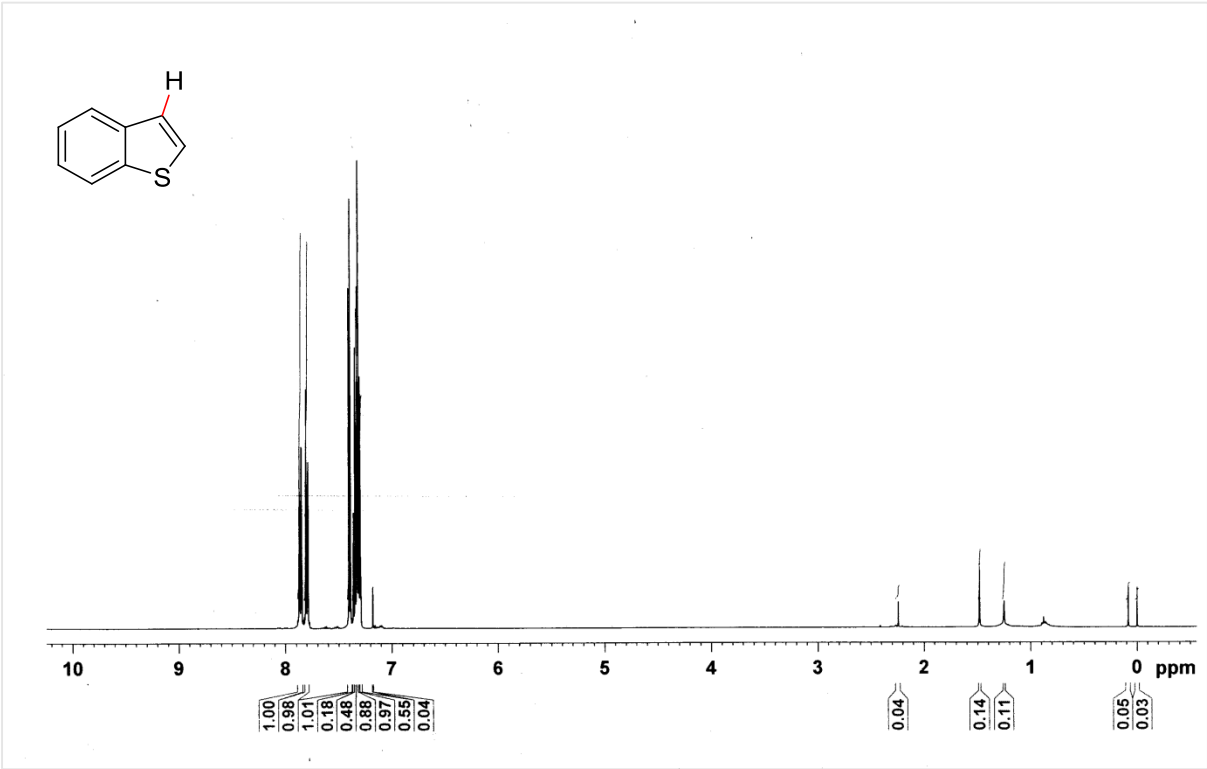

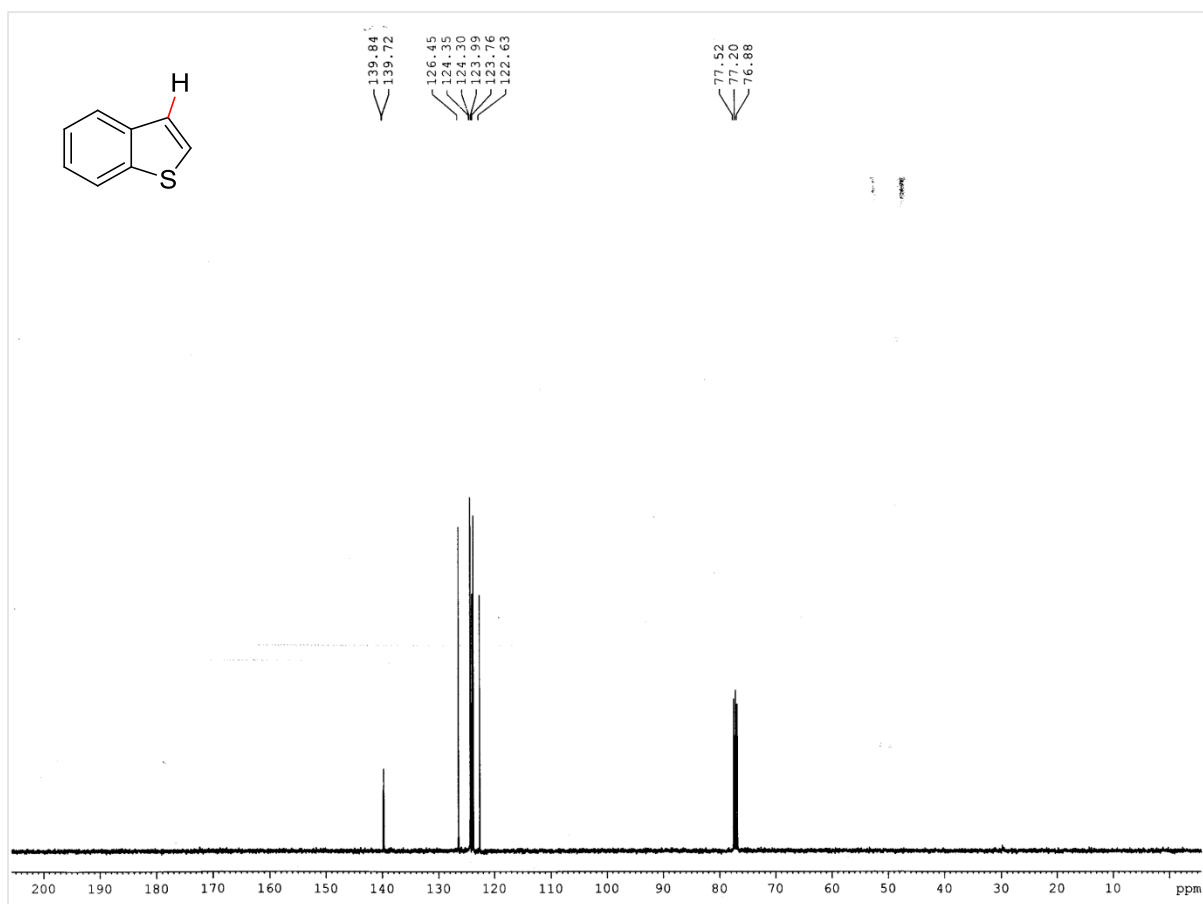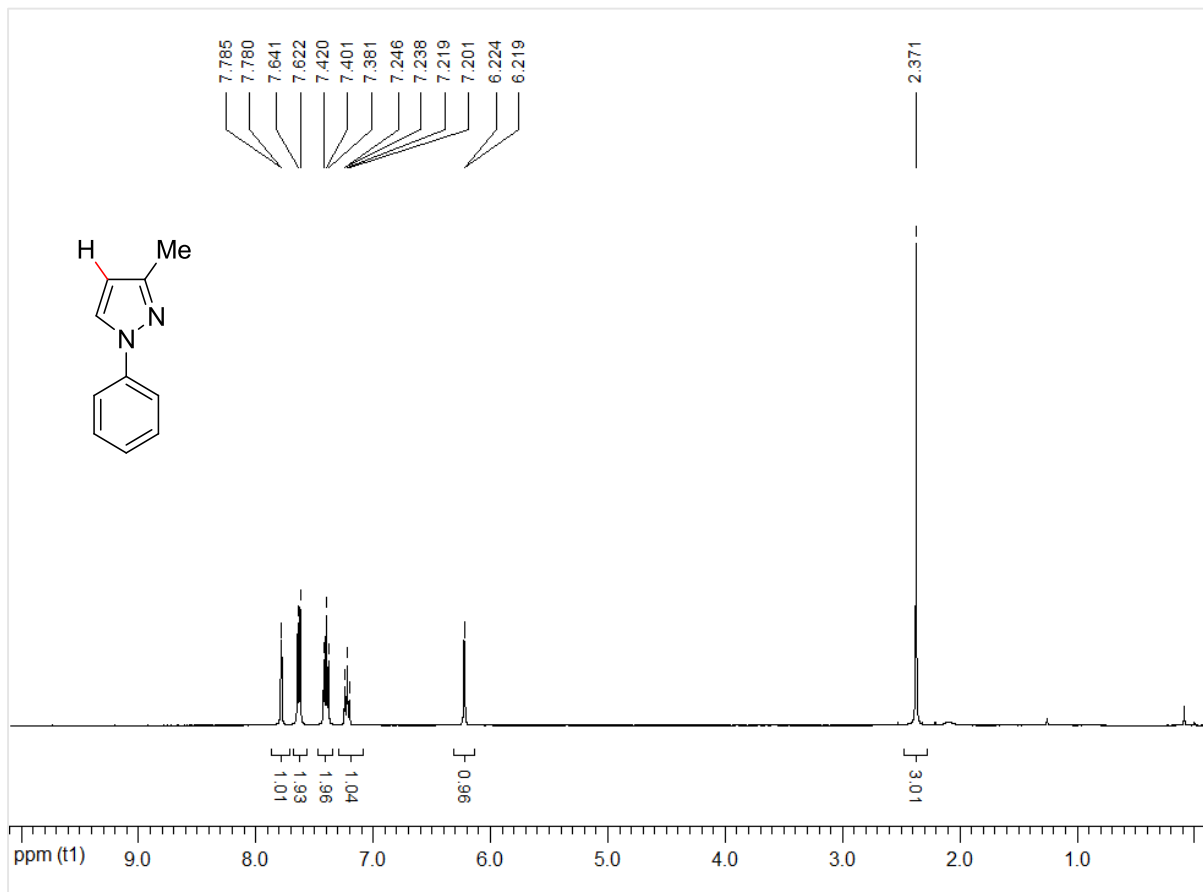

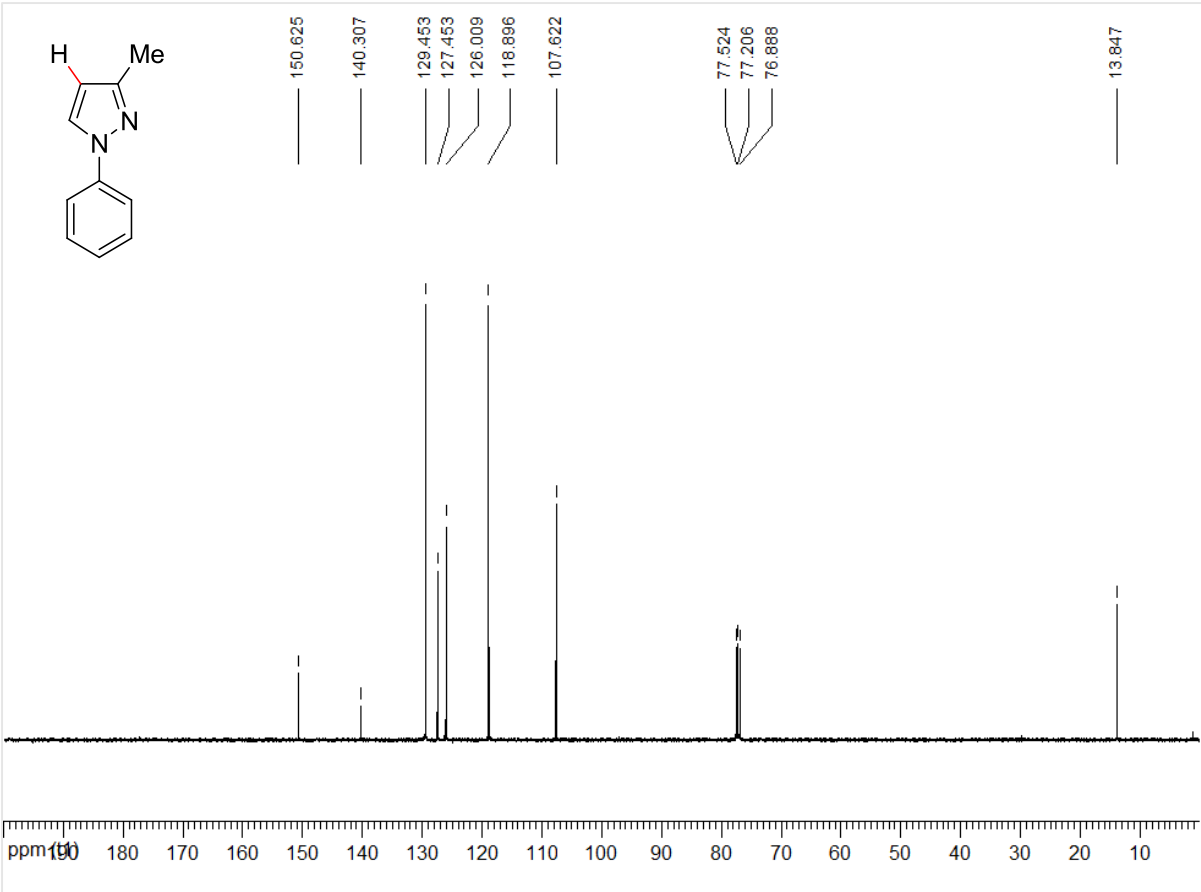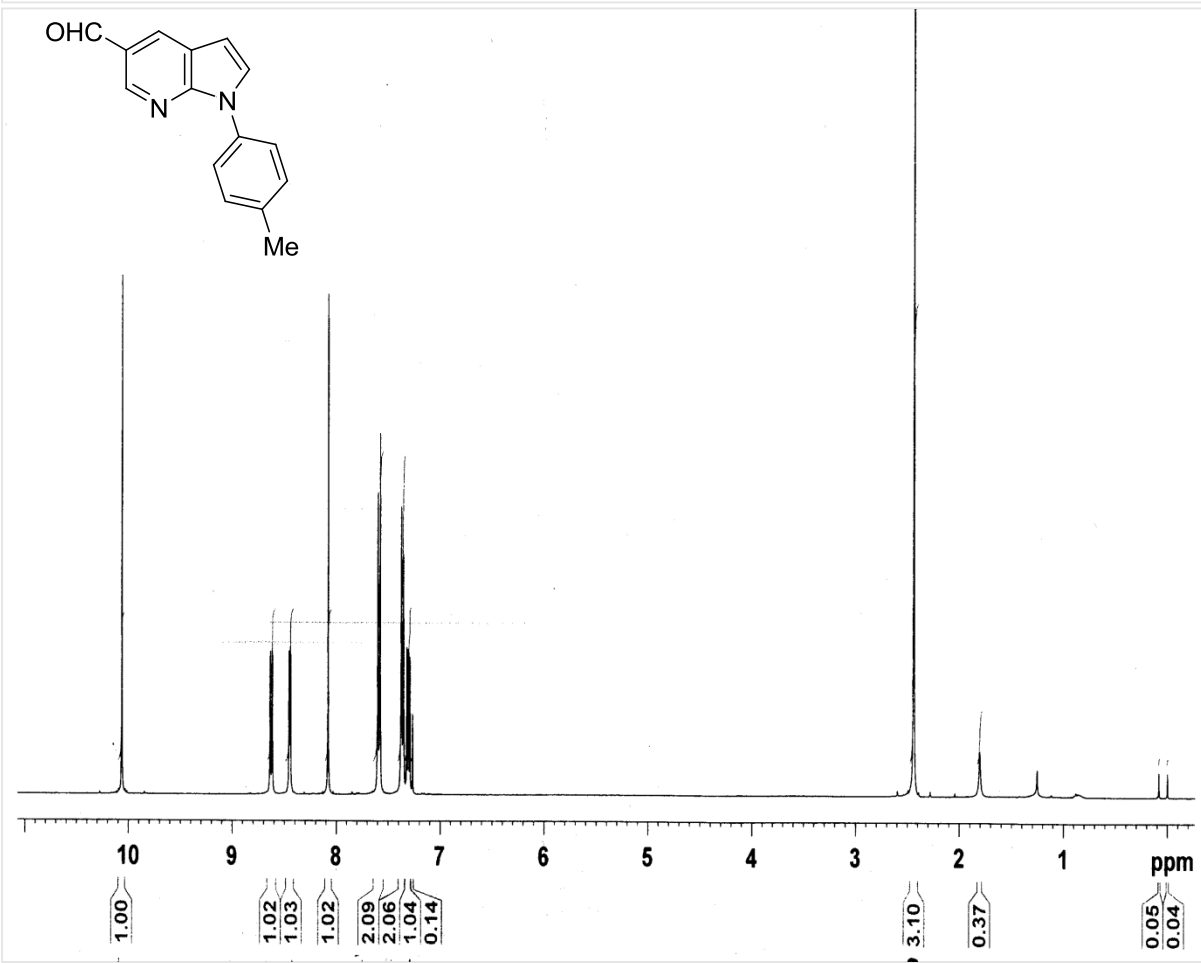



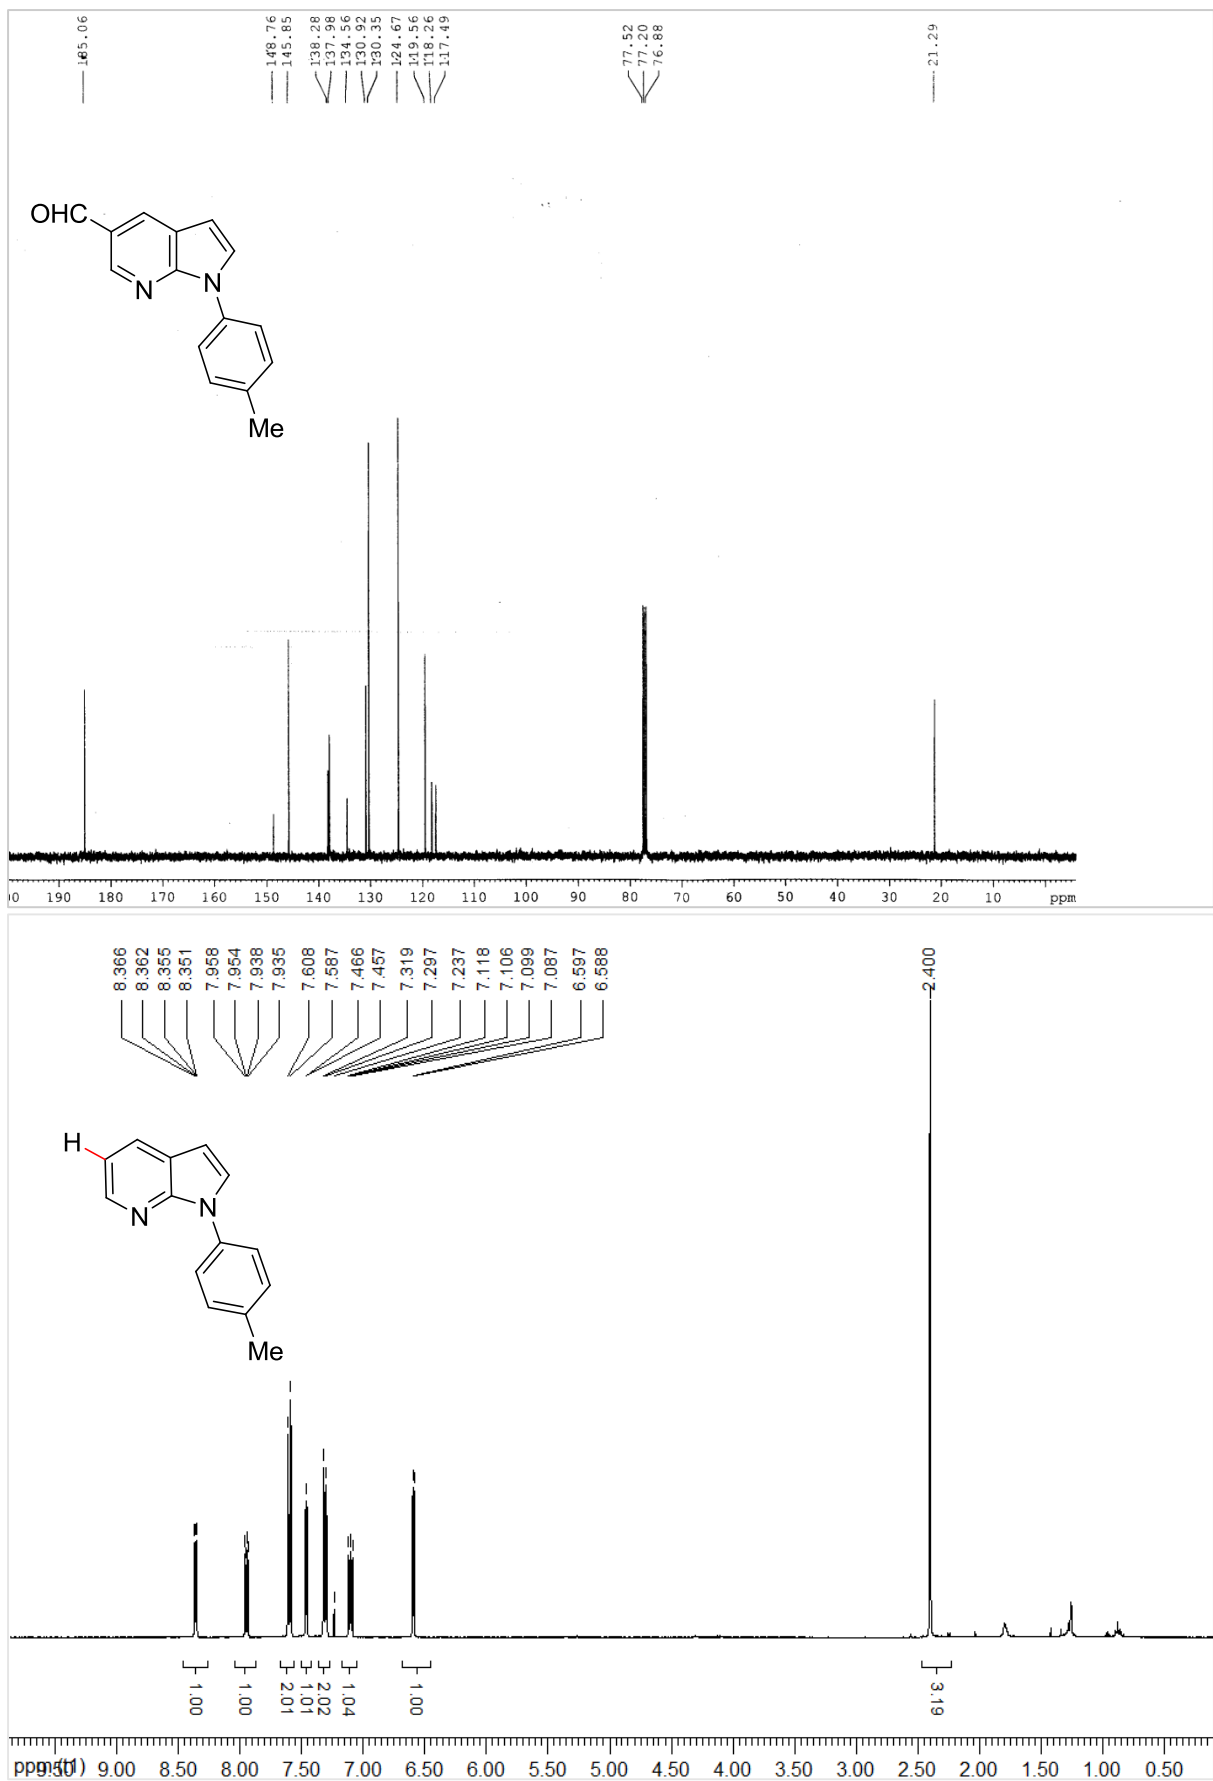

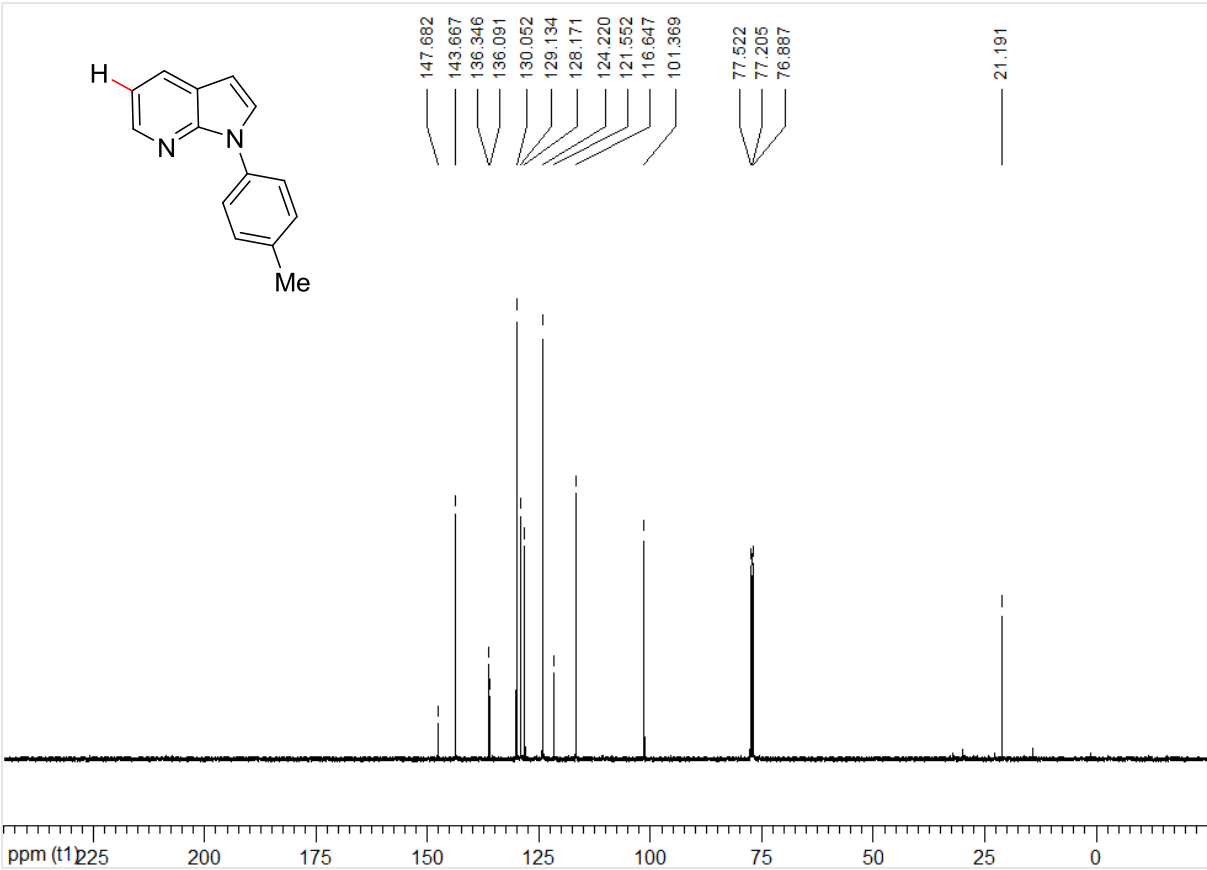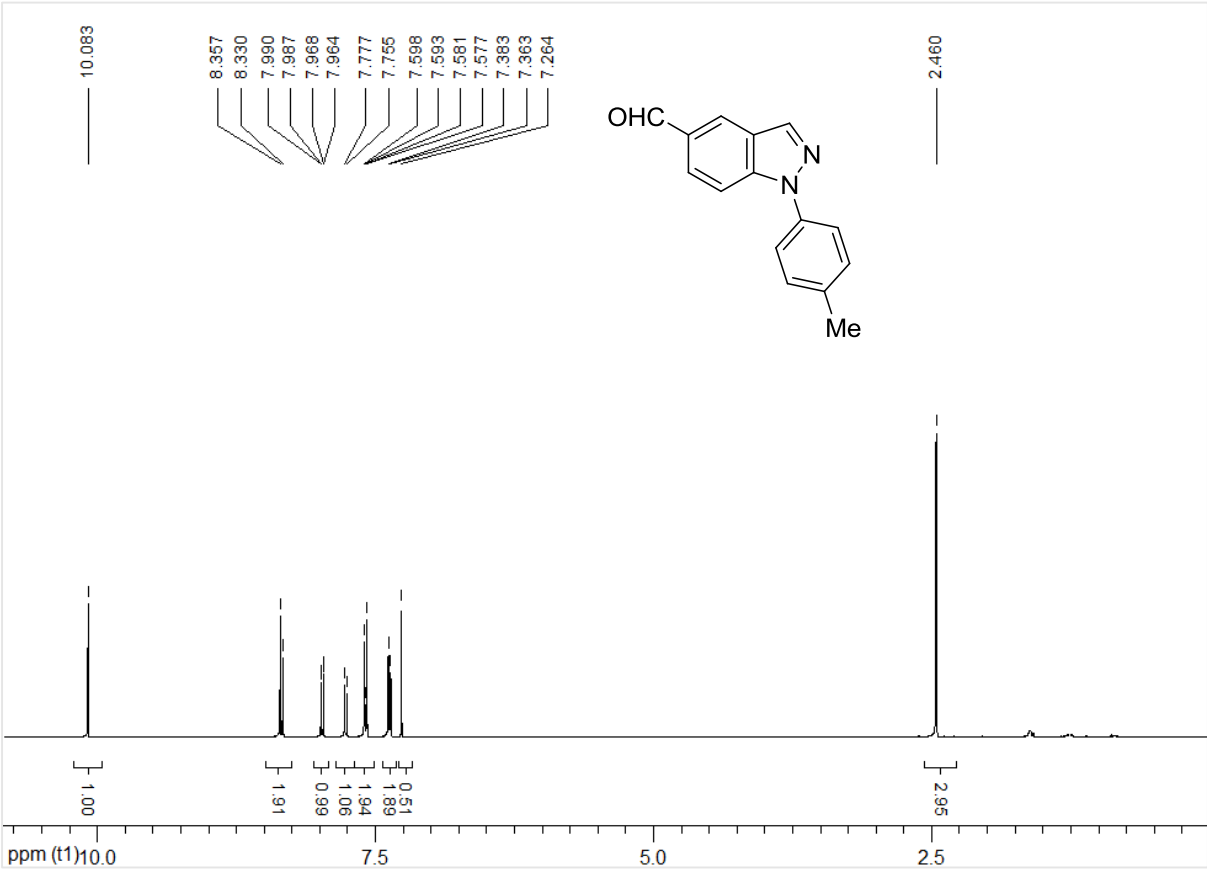

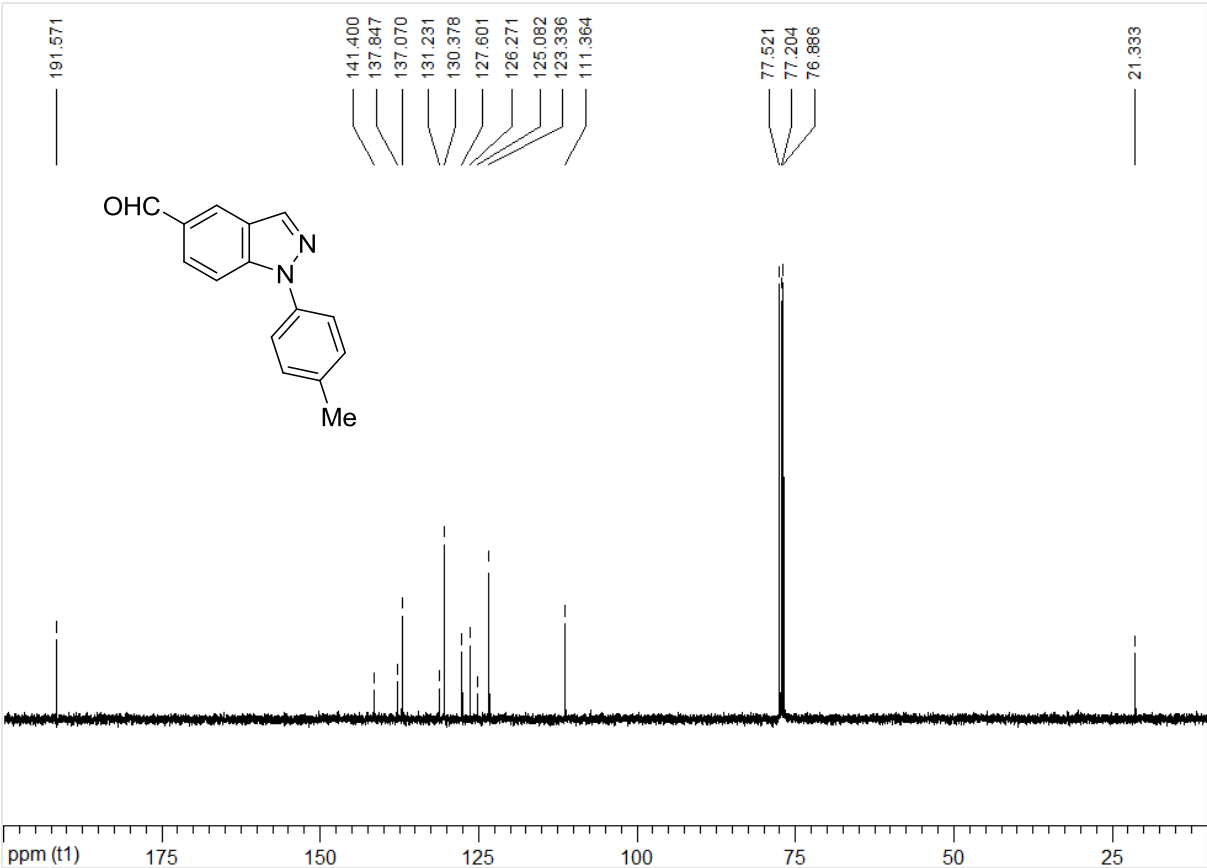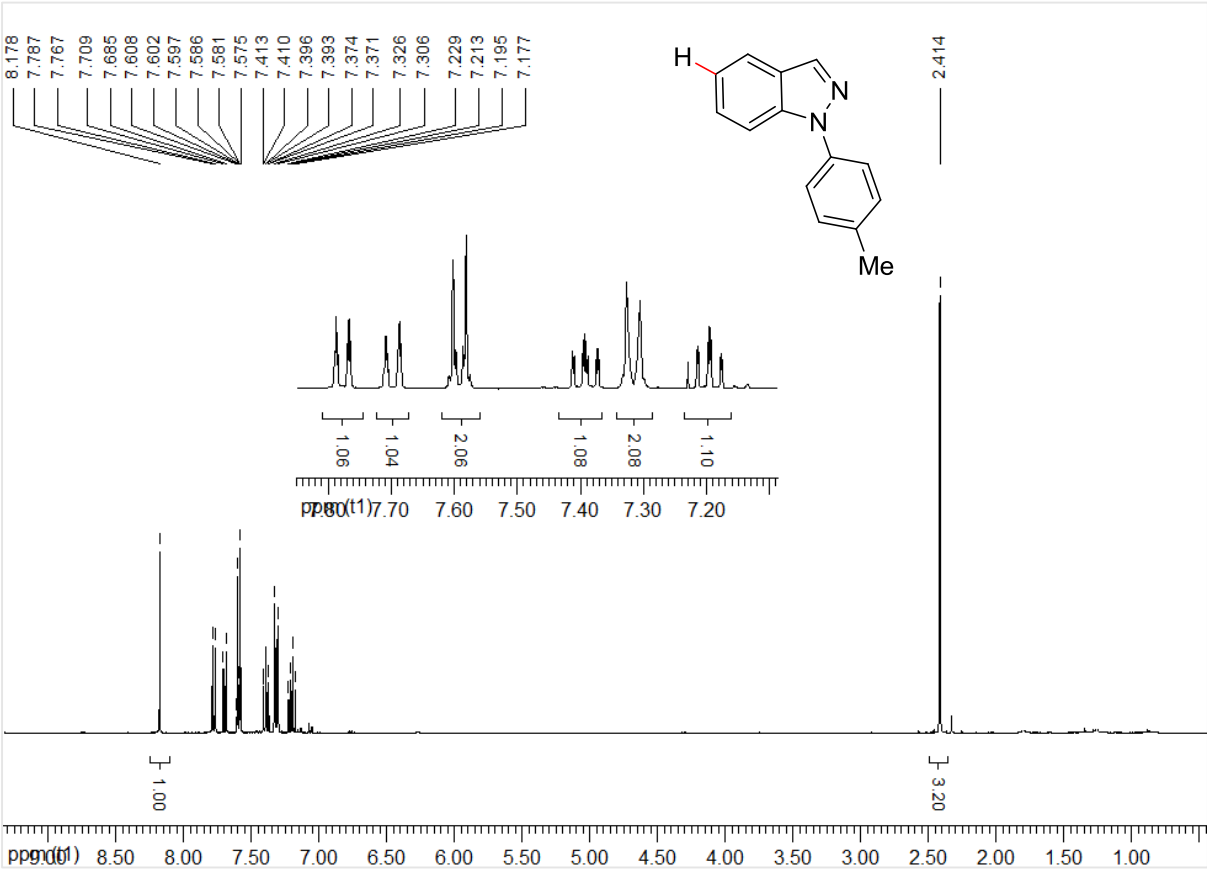

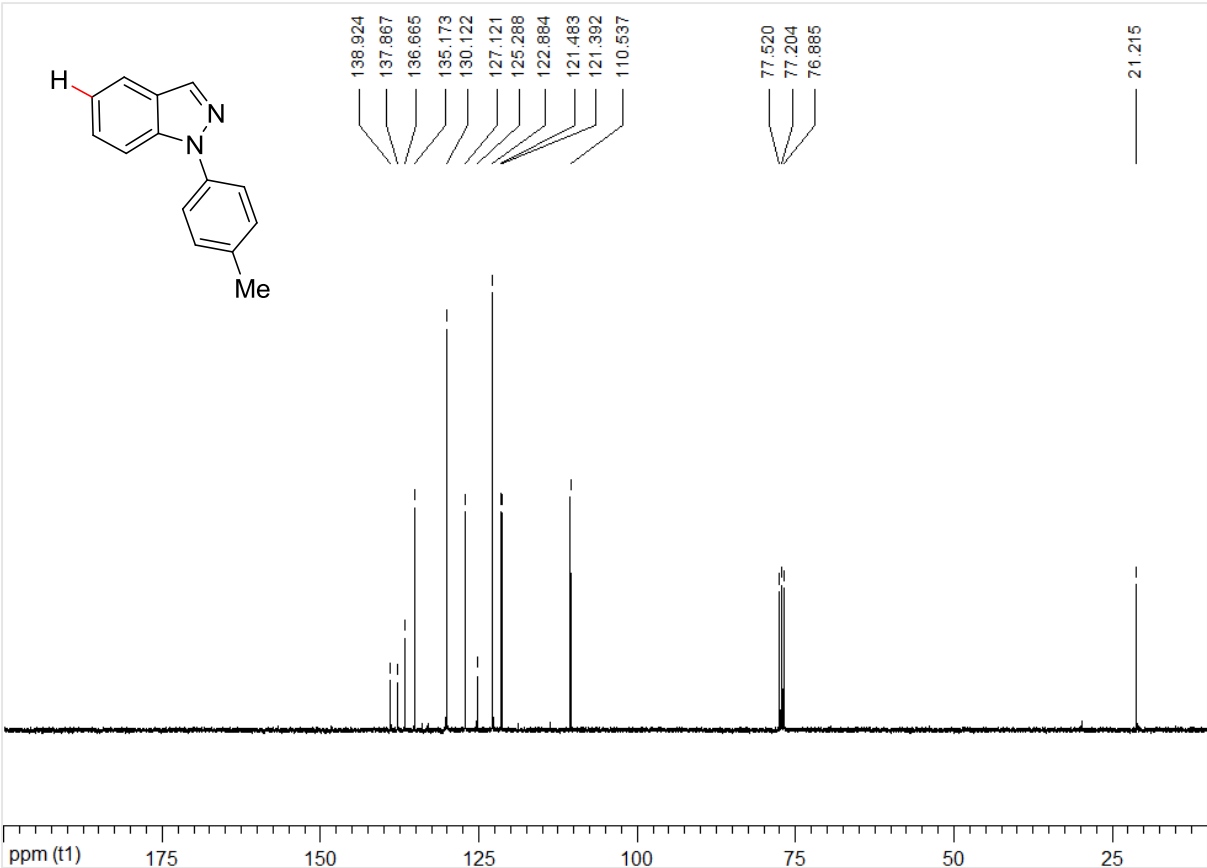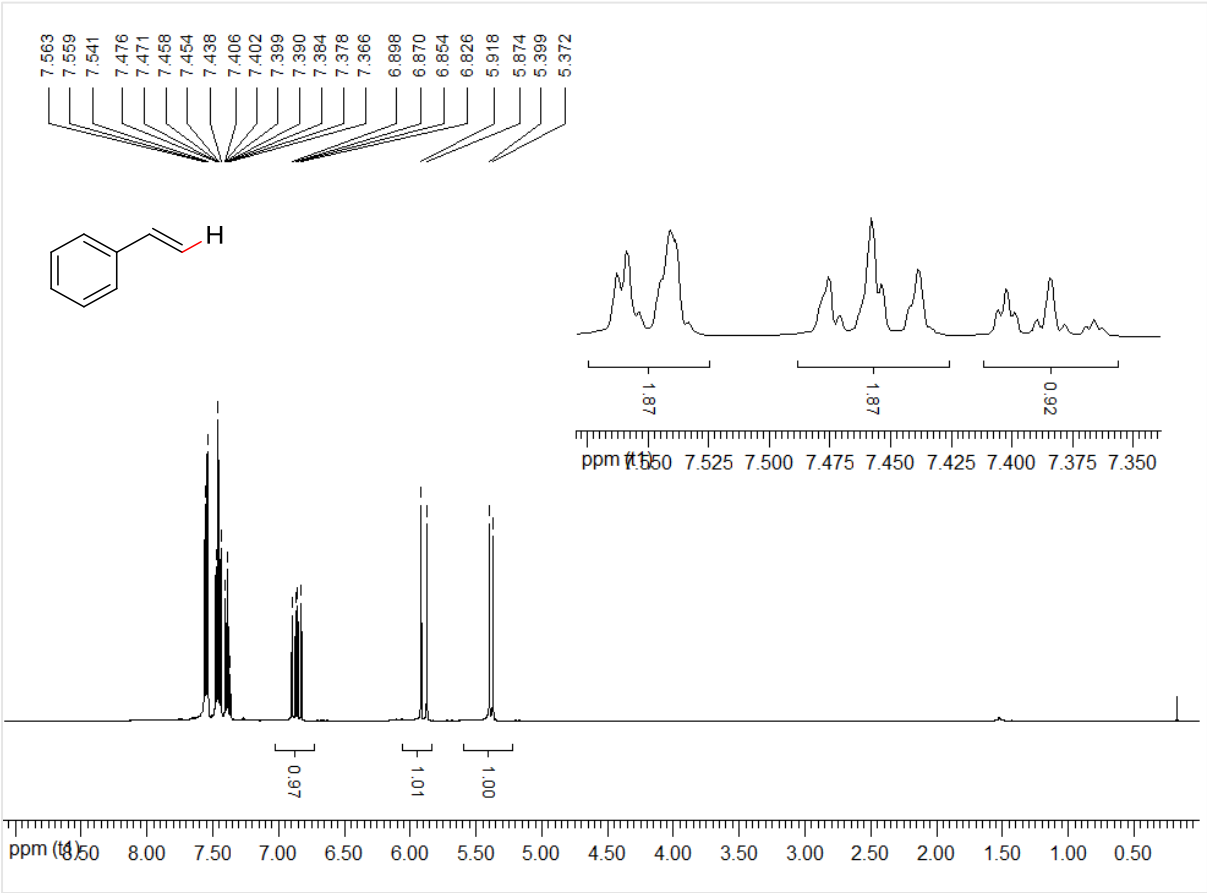

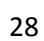

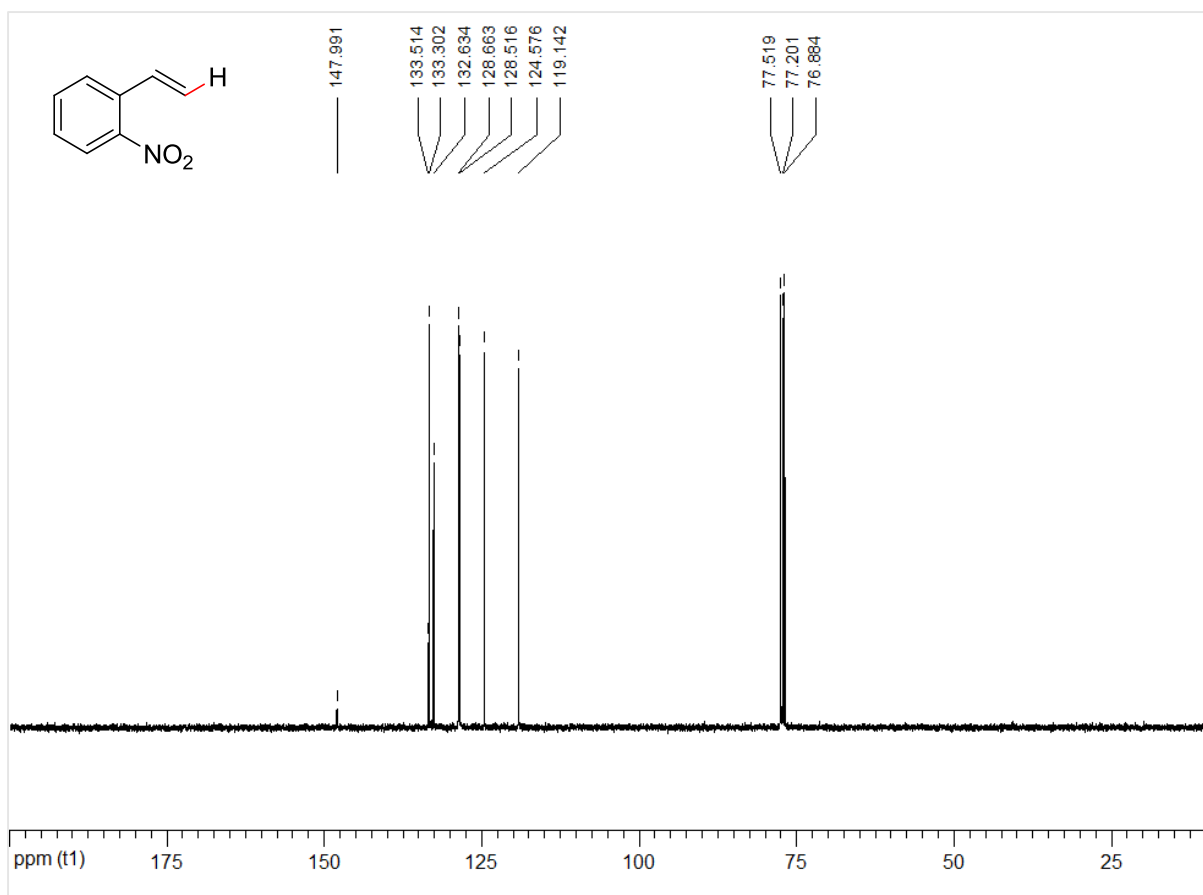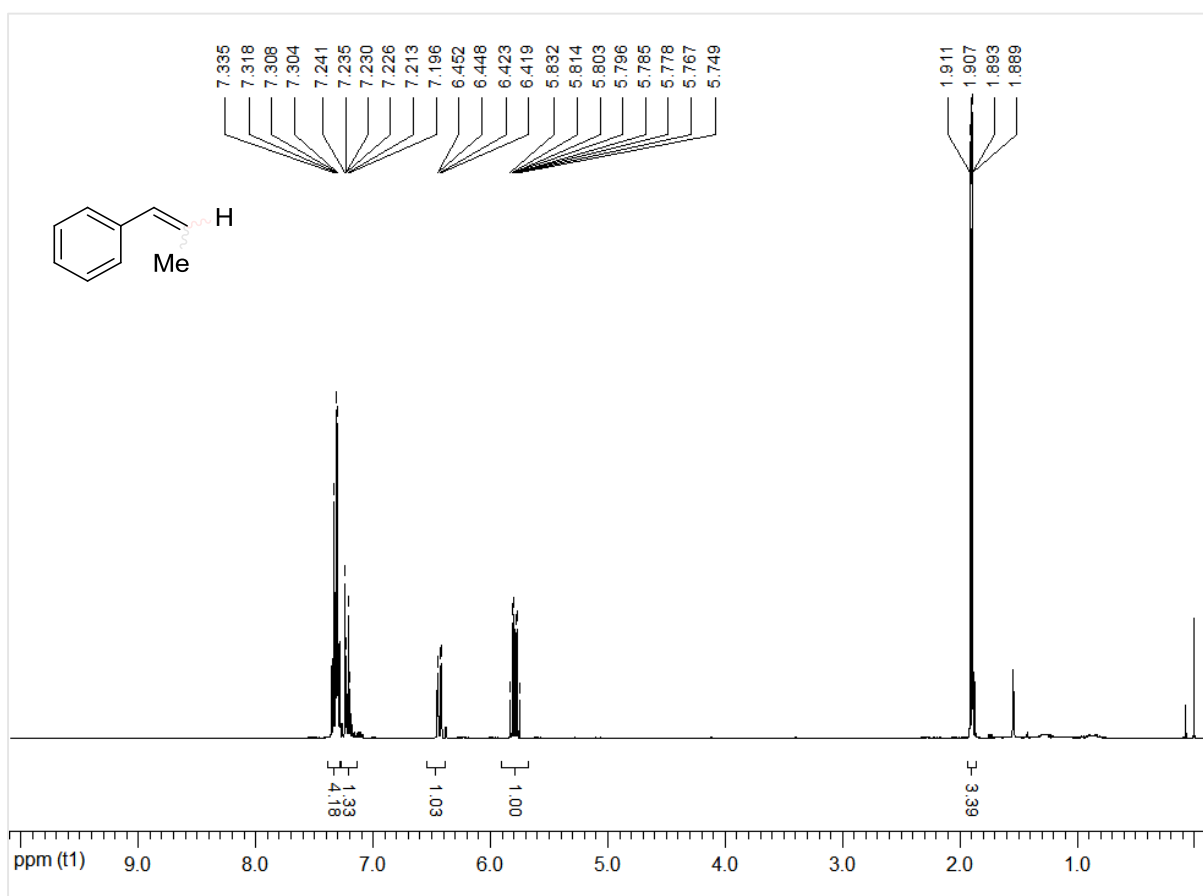

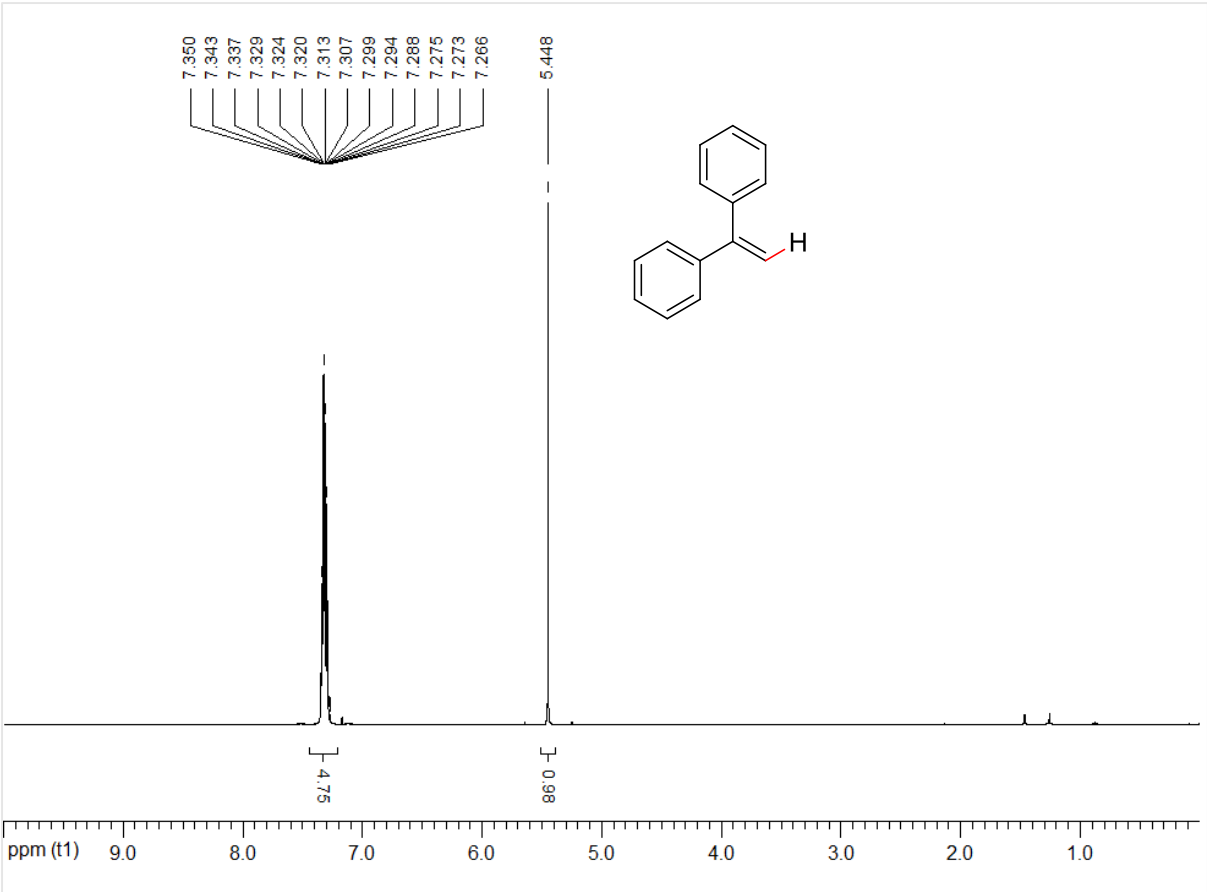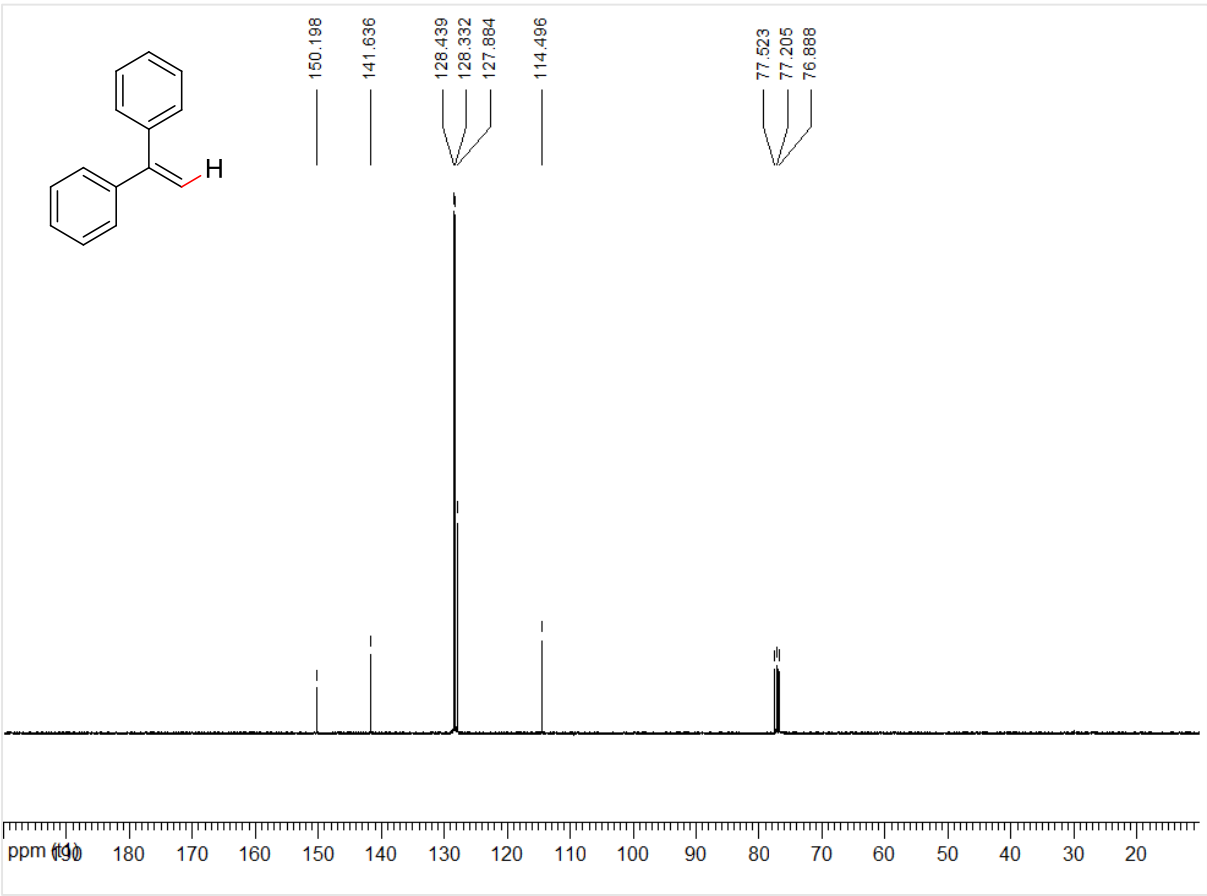

Supplement: c2cc31144e_2.pdf [file c2cc31144e_2.pdf]
